# Supplementary material for: Emergence of Epidemic Multidrug-Resistant Enterococcus faecium from Animal and Commensal Strains
Source: PubMed Central journal article supplement — mBio. 2013 Aug 20;4(4):e00534-13. doi: 10.1128/mBio.00534-13 (PMC3747589; doi:10.1128/mbio.00534-13), 2013-08-20
Supplement: mbo004131600st2.pdf [file mbo004131600st2.pdf]

Table S2. Differential Gene Presence

| Cluster | Group 1 | Group 2 | GeneID in ref. genome | Function or Pfam <sup>1</sup>                                                                                                                                                                                                   | Fraction of group 1                                                                                                                           | Fraction of group 2 |
|---------|---------|---------|-----------------------|---------------------------------------------------------------------------------------------------------------------------------------------------------------------------------------------------------------------------------|-----------------------------------------------------------------------------------------------------------------------------------------------|---------------------|
| C2      | A       | B       | (1)-00149             | hypothetical protein                                                                                                                                                                                                            | 96%                                                                                                                                           | 0%                  |
|         | A       | B       | (1)-00226             | PF1291.2 RelB_N[Antitoxin of toxin-antitoxin stability system N-terminal]                                                                                                                                                       | 98%                                                                                                                                           | 7%                  |
| C8      | A       | B       | (1)-00227             | PF06789.8 Plasmid_Txe[Plasmid encoded toxin Txe].PF05016.9[Plasmid_stabI[Plasmid stabilisation system protein]                                                                                                                  | 98%                                                                                                                                           | 7%                  |
|         | A       | B       | (1)-00228             | hypothetical protein                                                                                                                                                                                                            | 98%                                                                                                                                           | 7%                  |
|         | A       | B       | (1)-00229             | hypothetical protein                                                                                                                                                                                                            | 91%                                                                                                                                           | 0%                  |
|         | A       | B       | (1)-00329             | PF13527.1 Acetyltransf_9[Acetyltransferase (GNAT) domain]                                                                                                                                                                       | 91%                                                                                                                                           | 0%                  |
|         | A       | B       | (1)-00353             | PF08279.7 HTH_11[HTH domain]                                                                                                                                                                                                    | 88%                                                                                                                                           | 0%                  |
|         | A       | B       | (1)-00693             | hypothetical protein                                                                                                                                                                                                            | 86%                                                                                                                                           | 0%                  |
|         | A       | B       | (1)-00998             | hypothetical protein                                                                                                                                                                                                            | 95%                                                                                                                                           | 0%                  |
|         | A       | B       | (1)-01075             | hypothetical protein                                                                                                                                                                                                            | 98%                                                                                                                                           | 0%                  |
|         | A       | B       | (1)-01076             | hypothetical protein                                                                                                                                                                                                            | 100%                                                                                                                                          | 0%                  |
|         | A       | B       | (1)-01143             | hypothetical protein                                                                                                                                                                                                            | 88%                                                                                                                                           | 0%                  |
| C10     | A       | B       | (1)-01276             | hypothetical protein                                                                                                                                                                                                            | 95%                                                                                                                                           | 0%                  |
|         | A       | B       | (1)-01279             | PTS system, IICBA component / PF00358.15 PTS_EIIA_1[Phosphoenolpyruvate-dependent sugar phosphotransferase system, EIIA 1];TIGR00830[PTBA: PTS system, glucose subfamily, IIA component]                                        | 100%                                                                                                                                          | 0%                  |
|         | A       | B       | (1)-01280             | glycosyl hydrolase family protein / PF02056.11 Glyco_hydro_4[Family 4 glycosyl hydrolase]                                                                                                                                       | 100%                                                                                                                                          | 0%                  |
|         | A       | B       | (1)-01281             | PTS system, N-acetylglucosamine-specific IIB component / PF02378.13 PTS_EIIC[Phosphotransferase system, EIIC]                                                                                                                   | 100%                                                                                                                                          | 0%                  |
|         | A       | B       | (1)-01282             | PF04794.7 YjdC YjdC-like protein]                                                                                                                                                                                               | 100%                                                                                                                                          | 0%                  |
|         | A       | B       | (1)-01283             | BglG family transcriptional antiterminator / PF00874.15 PRD[PRD domain]                                                                                                                                                         | 98%                                                                                                                                           | 0%                  |
| C11     | A       | B       | (1)-01493             | PF13242.1 Hydrolase_like[HAD-hydrolase-like].PF00702.21 Hydrolase[haloacid dehalogenase-like hydrolase]                                                                                                                         | 80%                                                                                                                                           | 13%                 |
|         | A       | B       | (1)-01503             | PF00389.25 2-Hacid_dh[D-isomer specific 2-hydroxyacid dehydrogenase, catalytic domain]                                                                                                                                          | 80%                                                                                                                                           | 13%                 |
|         | A       | B       | (1)-01504             | TIGR00872[gnd_rel: 6-phosphogluconate dehydrogenase (decarboxylating)]                                                                                                                                                          | 80%                                                                                                                                           | 13%                 |
|         | A       | B       | (1)-01505             | PF13580.1 SIS_2[SIS domain].PF01380.17 SIS[SIS domain].PF01418.12 HTH_6[Helix-turn-helix domain, rpiI family]                                                                                                                   | 80%                                                                                                                                           | 13%                 |
|         | A       | B       | (1)-01516             | PF00923.14 Transaldolase[Transaldolase]                                                                                                                                                                                         | 84%                                                                                                                                           | 13%                 |
| C12     | A       | B       | (1)-01517             | PF03929.8 PTSA_4[PTS system, glucitol/sorbitol-specific IICa component].PF00923.14 Transaldolase[Transaldolase]                                                                                                                 | 84%                                                                                                                                           | 13%                 |
|         | A       | B       | (1)-01519             | PF07863.6 EIIIC-GUT_C[Sorbitol phosphotransferase enzyme II C-terminus];TIGR00825 EIIIC-GUT_PTS system, glucitol/sorbitol-specific, IIB component].PF03612.9 EIIIC-GUT_N[Sorbitol phosphotransferase enzyme II N-terminus]      | 84%                                                                                                                                           | 13%                 |
|         | A       | B       | (1)-01520             | TIGR00821[EII-GUT_PTS system, glucitol/sorbitol-specific, IIC component].PF03608.8 EII-GUT PTS system enzyme II sorbitol-specific factor]                                                                                       | 84%                                                                                                                                           | 13%                 |
|         | A       | B       | (1)-01521             | TIGR00821[EII-GUT_PTS system, glucitol/sorbitol-specific, IIC component].PF03608.8 EII-GUT PTS system enzyme II sorbitol-specific factor].PF06923.6 GutM[Glucitol operon activator protein (GutM)]                              | 84%                                                                                                                                           | 13%                 |
|         | A       | B       | (1)-01522             | PF00874.15 PRD[PRD domain].PF05043.8 Mga[Mga Helix-turn-helix domain].PF00359.17 PTS_EIIA_2[Phosphoenolpyruvate-dependent sugar phosphotransferase system, EIIA 2]                                                              | 84%                                                                                                                                           | 13%                 |
|         | A       | B       | (1)-01523             | PF13561.1 adh_short_C2 Enoyl-(Acyl carrier protein) reductase].PF08659.5 K R[KR domain].PF00106.20 adh_short[short chain dehydrogenase].PF01370.16 Epmirase[NAD dependent epimerase/dehydratase family]                         | 84%                                                                                                                                           | 13%                 |
|         | A       | B       | (1)-01677             | hypothetical protein                                                                                                                                                                                                            | 100%                                                                                                                                          | 0%                  |
|         | A       | B       | (1)-01684             | hypothetical protein                                                                                                                                                                                                            | 98%                                                                                                                                           | 0%                  |
| C17     | A       | B       | (1)-01766             | PF02275.13 CBAH[Linear amide C-N hydrolases, choloylglycine hydrolase family]                                                                                                                                                   | 96%                                                                                                                                           | 0%                  |
|         | A       | B       | (1)-01798             | hypothetical protein                                                                                                                                                                                                            | 91%                                                                                                                                           | 0%                  |
|         | A       | B       | (1)-01889             | PF13630.1 SdpI[SdpI/YhfL protein family]                                                                                                                                                                                        | 80%                                                                                                                                           | 13%                 |
|         | A       | B       | (1)-02231             | PF00149.23 Metallophos[Caseinase-like phosphoesterase]                                                                                                                                                                          | 90%                                                                                                                                           | 0%                  |
|         | A       | B       | (1)-02234             | PF00805.17 Pentapeptide Pentapeptide repeats (8 copies)].PF13599.1 Pentapeptide_4 Pentapeptide repeats (9 copies)]                                                                                                              | 96%                                                                                                                                           | 0%                  |
|         | A       | B       | (1)-02295             | PF02517.11 Abj CAAX protease self-immunity]                                                                                                                                                                                     | 91%                                                                                                                                           | 0%                  |
|         | A       | B       | (1)-02306             | PF00583.19 Acetyltransf_1[Acetyltransferase (GNAT) family]                                                                                                                                                                      | 100%                                                                                                                                          | 0%                  |
|         | A       | B       | (1)-02463             | PF01061.19 ABC2_membrane ABC-2 type transporter].PF12698.2 ABC2_membrane_3 ABC-2 family transporter protein]                                                                                                                    | 100%                                                                                                                                          | 0%                  |
|         | A       | B       | (1)-02464             | PF12698.2 ABC2_membrane_3 ABC-2 family transporter protein]                                                                                                                                                                     | 100%                                                                                                                                          | 0%                  |
|         | A       | B       | (1)-02465             | PF00005.22 ABC_tran ABC transporter].PF13304.1 AAA_21 AAA domain]                                                                                                                                                               | 100%                                                                                                                                          | 0%                  |
|         | A       | B       | (1)-02466             | PF07730.8 HiskA_3 Histidine kinase].PF02518.21 HATPase_c Histidine kinase-, DNA gyrase B-, and HSP90-like ATPase]                                                                                                               | 100%                                                                                                                                          | 0%                  |
|         | A       | B       | (1)-02467             | PF00196.14 GerE Bacterial regulatory proteins, luxR family].PF00072.19 Response_reg Response regulator receiver domain]                                                                                                         | 100%                                                                                                                                          | 0%                  |
| C20     | A       | B       | (1)-02468             | hypothetical protein                                                                                                                                                                                                            | 100%                                                                                                                                          | 0%                  |
|         | A       | B       | (1)-02508             | hypothetical protein                                                                                                                                                                                                            | 96%                                                                                                                                           | 0%                  |
|         | A       | B       | (1)-02509             | PF00005.22 ABC_tran ABC transporter].PF13304.1 AAA_21 AAA domain].PF12848.2 ABC_tran_2 ABC transporter]                                                                                                                         | 100%                                                                                                                                          | 0%                  |
|         | A       | B       | (1)-02577             | PF05738.8 Cna_B Cna protein B-type domain].TIGR01167 LPXTG_anchor: LPXTG-motif cell wall anchor domain]                                                                                                                         | 98%                                                                                                                                           | 0%                  |
| C21     | A       | B       | (1)-02578             | hypothetical protein                                                                                                                                                                                                            | 82%                                                                                                                                           | 0%                  |
|         | A       | B       | (1)-02582             | PF02012.15 BNR Asp-box repeat]                                                                                                                                                                                                  | 95%                                                                                                                                           | 0%                  |
|         | A       | B       | (1)-02673             | PF13460.1 NAD_binding_10 NADH(P)-binding].PF08659.5 K R[KR domain].PF08643.5 DUF1776[Fungal family of unknown function (DUF1776)].PF13561.1 adh_short_C2 Enoyl-(Acyl carrier protein) reductase]                                | 98%                                                                                                                                           | 0%                  |
|         | A       | B       | (1)-02674             | PF00132.19 Hexapep[Bacterial transferase hexapeptide (six repeats)]                                                                                                                                                             | 98%                                                                                                                                           | 0%                  |
|         | A       | B       | (1)-02675             | PF03466.15 LysR_substrate LysR substrate binding domain]                                                                                                                                                                        | 98%                                                                                                                                           | 0%                  |
|         | A       | B       | (1)-02696             | PF12730.2 ABC2_membrane_4 ABC-2 family transporter protein]                                                                                                                                                                     | 98%                                                                                                                                           | 7%                  |
|         | A       | B       | (1)-02697             | PF12679.2 ABC2_membrane_2 ABC-2 family transporter protein].PF00005.22 ABC_tran ABC transporter].PF13304.1 AAA_21 AAA domain]                                                                                                   | 100%                                                                                                                                          | 7%                  |
|         | A       | B       | (1)-02698             | hypothetical protein                                                                                                                                                                                                            | 95%                                                                                                                                           | 7%                  |
|         | A       | B       | (1)-02820             | TIGR01990 BPGM: beta-phosphoglucomutase].PF13419.1 HAD_2 Haloacid dehalogenase-like hydrolase].PF13242.1 Hydrolase_like[HAD-hydrolase-like]                                                                                     | 100%                                                                                                                                          | 0%                  |
|         | A       | B       | (1)-02821             | PF02595.10 Gly_kinase Glycerate kinase family].TIGR00045 Glycerate kinase]                                                                                                                                                      | 100%                                                                                                                                          | 0%                  |
| C24     | A       | B       | (1)-02822             | PF02595.10 Gly_kinase Glycerate kinase family].PF03632.10 Glyco_hydro_65n Glycosyl hydrolase family 65 central catalytic domain]                                                                                                | 100%                                                                                                                                          | 0%                  |
|         | A       | B       | (1)-02823             | PF01408.17 GFO_IDH_MocA Oxidoreductase family, NAD-binding Rossmann fold].PF03636.10 Glyco_hydro_65N Glycosyl hydrolase family 65, N-terminal domain]                                                                           | 100%                                                                                                                                          | 0%                  |
|         | A       | B       | (1)-02824             | PF01261.19 AP_endonuc_2 Xylose isomerase-like TIM barrel]                                                                                                                                                                       | 100%                                                                                                                                          | 0%                  |
|         | A       | B       | (1)-02825             | PF00107.21 ADH_zinc_N Zinc-binding dehydrogenase]                                                                                                                                                                               | 100%                                                                                                                                          | 0%                  |
|         | A       | B       | (1)-02826             | PF00528.17 BPD_transp_1 Binding-protein-dependent transport system inner membrane component]                                                                                                                                    | 100%                                                                                                                                          | 0%                  |
|         | A       | B       | (1)-02827             | PF00528.17 BPD_transp_1 Binding-protein-dependent transport system inner membrane component]                                                                                                                                    | 100%                                                                                                                                          | 0%                  |
|         | A       | B       | (1)-02828             | PF13531.1 SBP_bac_11 Bacterial extracellular solute-binding protein].PF13416.1 SBP_bac_8 Bacterial extracellular solute-binding protein]                                                                                        | 100%                                                                                                                                          | 0%                  |
|         | A       | B       | (1)-02829             | PF00128.19 Alpha-amylase Alpha amylase, catalytic domain]                                                                                                                                                                       | 100%                                                                                                                                          | 0%                  |
|         | A       | B       | (1)-02830             | PF13377.1 Peripla_BP_3 Periplasmic binding protein-like domain].PF00356.16 LacI Bacterial regulatory proteins, lacI family]                                                                                                     | 100%                                                                                                                                          | 0%                  |
|         | C30     | B       | A                     | (3)-00029                                                                                                                                                                                                                       | PF00652.17 Ricin_B_lectin[Ricin-type beta-trefoil lectin domain].PF00388.14 PI-PLC-X[Phosphatidylinositol-specific phospholipase C, X domain] | 100%                |
| B       |         | A       | (3)-00124             | PF13443.1 HTH_26 Cro/C1-type HTH DNA-binding domain].PF01381.17 HTH_3 Helix-turn-helix].PF12844.2 HTH_19 Helix-turn-helix domain]                                                                                               | 100%                                                                                                                                          | 4%                  |
| B       |         | A       | (3)-00125             | PF13396.1 PLDc_N Phospholipase_D_nuclease N-terminal]                                                                                                                                                                           | 100%                                                                                                                                          | 4%                  |
| B       |         | A       | (3)-00126             | PF00005.22 ABC_tran ABC transporter].PF13304.1 AAA_21 AAA domain]                                                                                                                                                               | 100%                                                                                                                                          | 5%                  |
| B       |         | A       | (3)-00127             | PF12730.2 ABC2_membrane_4 ABC-2 family transporter protein]                                                                                                                                                                     | 100%                                                                                                                                          | 4%                  |
| B       |         | A       | (3)-00159             | hypothetical protein                                                                                                                                                                                                            | 100%                                                                                                                                          | 0%                  |
| B       |         | A       | (3)-00160             | PF05543.8 Peptidase_C47 Staphopain peptidase C47]                                                                                                                                                                               | 100%                                                                                                                                          | 0%                  |
| B       |         | A       | (3)-00161             | hypothetical protein                                                                                                                                                                                                            | 100%                                                                                                                                          | 0%                  |
| B       |         | A       | (3)-00162             | TIGR01716 RGG_Cterm: transcriptional activator, Rgg/GadR/MutR family, C-terminal domain]                                                                                                                                        | 100%                                                                                                                                          | 0%                  |
| B       |         | A       | (3)-00257             | hypothetical protein                                                                                                                                                                                                            | 100%                                                                                                                                          | 4%                  |
| C32     | B       | A       | (3)-00258             | hypothetical protein                                                                                                                                                                                                            | 100%                                                                                                                                          | 4%                  |
|         | B       | A       | (3)-00259             | hypothetical protein                                                                                                                                                                                                            | 100%                                                                                                                                          | 4%                  |
|         | B       | A       | (3)-00278             | PF13419.1 HAD_2 Haloacid dehalogenase-like hydrolase].PF13242.1 Hydrolase_like[HAD-hydrolase-like]                                                                                                                              | 100%                                                                                                                                          | 9%                  |
|         | B       | A       | (3)-00279             | PF00004.24 AAA ATPase family associated with various cellular activities (AAA)].PF01078.16 Mg_chelatase[Magnesium chelatase, subunit CHL1].PF13401.1 AAA_22 AAA domain].PF00158.21 Sigma54_activat Sigma-54 interaction domain] | 100%                                                                                                                                          | 9%                  |
|         | B       | A       | (3)-00282             | PF03609.9 EII-Sor PTS system sorbose-specific iic component]                                                                                                                                                                    | 100%                                                                                                                                          | 9%                  |
|         | B       | A       | (3)-00283             | PF03830.10 PTSIIb_sorb PTS system sorbose subfamily IIB component]                                                                                                                                                              | 100%                                                                                                                                          | 9%                  |
| C33     | B       | A       | (3)-00284             | PF03830.10 PTSIIb_sorb PTS system sorbose subfamily IIB component].PF03610.11 EIIA-man PTS system fructose IIA component]                                                                                                       | 100%                                                                                                                                          | 9%                  |
|         | B       | A       | (3)-00310             | PF03806.8 ABG_transport AbgT putative transporter family]                                                                                                                                                                       | 100%                                                                                                                                          | 4%                  |
|         | B       | A       | (3)-00311             | TIGR01887 dipeptidase putative dipeptidase].PF01546.23 Peptidase_M20 Peptidase family M20/M25/M40]                                                                                                                              | 100%                                                                                                                                          | 4%                  |
|         | B       | A       | (3)-00373             | PF00589.17 Phage_integrase Phage integrase family]                                                                                                                                                                              | 93%                                                                                                                                           | 5%                  |
| C35     | B       | A       | (3)-00380             | PF01418.12 HTH_9 Helix-turn-helix domain, rpiI family].PF01380.17 SIS[SIS domain]                                                                                                                                               | 87%                                                                                                                                           | 0%                  |
|         | B       | A       | (3)-00391             | PF02056.11 Glyco_hydro_4 Family 4 glycosyl hydrolase]                                                                                                                                                                           | 87%                                                                                                                                           | 0%                  |
|         | B       | A       | (3)-00392             | TIGR02005 PTS_IIB-alpha: PTS system, alpha-glucoside-specific IIB component].TIGR00826 EIIb_glc: PTS system, glucose-like IIB component]                                                                                        | 93%                                                                                                                                           | 0%                  |
|         | B       | A       | (3)-00431             | PF01656.18 CbaI CobQ/CobB/MinD/ParA nucleotide binding domain].PF09140.6 MipZ ATPase MipZ].TIGR01007 eps_fam: capsular exopolysaccharide family].PF13614.1 AAA_31 AAA domain]                                                   | 100%                                                                                                                                          | 4%                  |
|         | B       | A       | (3)-00538             | PF00583.19 Acetyltransf_1[Acetyltransferase (GNAT) family]                                                                                                                                                                      | 100%                                                                                                                                          | 0%                  |
| C34     | B       | A       | (3)-00575             | hypothetical protein                                                                                                                                                                                                            | 100%                                                                                                                                          | 0%                  |
|         | B       | A       | (3)-00603             | PF10022.4 DUF2264 Uncharacterized protein conserved in bacteria (DUF2264)]                                                                                                                                                      | 100%                                                                                                                                          | 0%                  |
|         | B       | A       | (3)-00604             | hypothetical protein                                                                                                                                                                                                            | 100%                                                                                                                                          | 0%                  |
|         | B       | A       | (3)-00605             | PF01301.14 Glyco_hydro_35 Glycosyl hydrolases family 35].PF02449.10 Glyco_hydro_42 Beta-galactosidase]                                                                                                                          | 100%                                                                                                                                          | 4%                  |
|         | B       | A       | (3)-00606             | PF07470.8 Glyco_hydro_88 Glycosyl Hydrolase Family 88]                                                                                                                                                                          | 100%                                                                                                                                          | 0%                  |
|         | B       | A       | (3)-00607             | PF00392.16 GntR Bacterial regulatory proteins, gntR family].PF07702.8 UTRA UTRA domain]                                                                                                                                         | 100%                                                                                                                                          | 0%                  |

|     |   |   |           |                                                                                                                                                                                       |      |     |
|-----|---|---|-----------|---------------------------------------------------------------------------------------------------------------------------------------------------------------------------------------|------|-----|
| C36 | B | A | (3)-00610 | PF00874.15[PRD PRD domain];PF05043.8[Mga Mga helix-turn-helix domain];PF00359.17[PTS_EIIA_2 Phosphoenolpyruvate-dependent sugar phosphotransferase system, EIIA 2]                    | 100% | 0%  |
|     | B | A | (3)-00611 | PF00359.17[PTS_EIIA_2 Phosphoenolpyruvate-dependent sugar phosphotransferase system, EIIA 2]                                                                                          | 100% | 0%  |
|     | B | A | (3)-00612 | hypothetical protein                                                                                                                                                                  | 93%  | 0%  |
|     | B | A | (3)-00613 | TIGR00848[ruA: PTS system, fructose subfamily, IIA component];PF00359.17[PTS_EIIA_2 Phosphoenolpyruvate-dependent sugar phosphotransferase system, EIIA 2]                            | 93%  | 0%  |
|     | B | A | (3)-00614 | hypothetical protein                                                                                                                                                                  | 100% | 0%  |
|     | B | A | (3)-00615 | TIGR01427[PTS_IIC_fructo: PTS system, Fru family, IIC component];PF02378.13[PTS_EIIC Phosphotransferase system, EIIC]                                                                 | 100% | 0%  |
|     | B | A | (3)-00616 | PF00834.14[Ribul_ P_3_epim Ribulose-phosphate 3 epimerase family]                                                                                                                     | 100% | 0%  |
|     | B | A | (3)-00617 | PF03830.10[PTS_IIB_sorb PTS system sorbose subfamily IIB component];PF03610.11[EIIA-man PTS system fructose IIA component]                                                            | 100% | 0%  |
|     | B | A | (3)-00618 | PF03809.9[EII-Sor PTS system sorbose-specific iic component]                                                                                                                          | 100% | 0%  |
|     | B | A | (3)-00619 | PF03613.9[EIID-AGA PTS system mannose/fructose/sorbose family IID component]                                                                                                          | 100% | 0%  |
| C37 | B | A | (3)-00620 | PF08124.6[Lyase_8_N Polysaccharide lyase family 8, N terminal alpha-helical domain];PF02278.13[Lyase_8 Polysaccharide lyase family 8, super-sandwich domain]                          | 100% | 0%  |
|     | B | A | (3)-00850 | PF02839.9[CBM_5_12 Carbohydrate binding domain];PF00041.16[fn3 Fibronectin type III domain];PF00704.23[Glyco_hydro_18 Glycosyl hydrolases family 18]                                  | 100% | 5%  |
|     | B | A | (3)-00950 | Chitinase C1 / PF02839.9[CBM_5_12 Carbohydrate binding domain];PF00041.16[fn3 Fibronectin type III domain];PF00704.23[Glyco_hydro_18 Glycosyl hydrolases family 18]                   | 100% | 0%  |
|     | B | A | (3)-00951 | TIGR01716[RGG_Cterm: transcriptional activator, Rgg/GadR/MutR family, C-terminal domain];PF01381.17[HTH_3 Helix-turn-helix];PF12844.2[HTH_19 Helix-turn-helix domain]                 | 100% | 0%  |
| C38 | B | A | (3)-00952 | PF03067.10[Chitin_bind_3 Chitin binding domain]                                                                                                                                       | 100% | 0%  |
|     | B | A | (3)-00961 | hypothetical protein                                                                                                                                                                  | 100% | 0%  |
| C39 | B | A | (3)-00962 | hypothetical protein                                                                                                                                                                  | 100% | 0%  |
|     | B | A | (3)-00999 | PF02018.12[CBM_4_9 Carbohydrate binding domain]                                                                                                                                       | 100% | 5%  |
|     | B | A | (3)-01081 | PF12840.2[HTH_20 Helix-turn-helix domain];PF01022.15[HTH_5 Bacterial regulatory protein, arsR family]                                                                                 | 93%  | 0%  |
|     | B | A | (3)-01098 | TIGR01167[LPXTG_anchor: LPXTG-motif cell wall anchor domain]                                                                                                                          | 93%  | 2%  |
|     | B | A | (3)-01099 | PF05043.8[Mga Mga helix-turn-helix domain];PF08280.6[HTH_Mga M protein trans-acting positive regulator (MGA) HTH domain]                                                              | 93%  | 2%  |
|     | B | A | (3)-01102 | agrC / hypothetical protein                                                                                                                                                           | 93%  | 2%  |
|     | B | A | (3)-01103 | agrA / PF04397.10[LytR LytR DNA-binding domain];PF00072.19[Response_reg Response regulator receiver domain]                                                                           | 93%  | 2%  |
|     | B | A | (3)-01104 | agrB / PF04647.10[AggB Accessory gene regulator B]                                                                                                                                    | 93%  | 2%  |
|     | B | A | (3)-01105 | agrD / cyclic lactone autoinducer peptide                                                                                                                                             | 93%  | 2%  |
|     | B | A | (3)-01300 | PF03577.10[Peptidase_C69 Peptidase family C69]                                                                                                                                        | 100% | 0%  |
| C41 | B | A | (3)-01359 | hypothetical protein                                                                                                                                                                  | 93%  | 7%  |
|     | B | A | (3)-01362 | hypothetical protein                                                                                                                                                                  | 100% | 7%  |
|     | B | A | (3)-01533 | hypothetical protein                                                                                                                                                                  | 93%  | 2%  |
|     | B | A | (3)-01605 | PF01717.13[Meth_synt_2 Cobalamin-independent synthase, Catalytic domain]                                                                                                              | 93%  | 14% |
|     | B | A | (3)-01634 | PF12844.2[HTH_19 Helix-turn-helix domain];PF01381.17[HTH_3 Helix-turn-helix]                                                                                                          | 100% | 14% |
|     | B | A | (3)-01635 | hypothetical protein                                                                                                                                                                  | 100% | 14% |
|     | B | A | (3)-01642 | PF00005.22[ABC_tran ABC transporter]                                                                                                                                                  | 100% | 0%  |
|     | B | A | (3)-01660 | PF12730.2[ABC2_membrane_4 ABC-2 family transporter protein]                                                                                                                           | 100% | 0%  |
|     | B | A | (3)-01661 | PF13304.1[AAA_21 AAA domain]                                                                                                                                                          | 100% | 2%  |
|     | B | A | (3)-01684 | hypothetical protein                                                                                                                                                                  | 93%  | 0%  |
| C42 | B | A | (3)-01695 | hypothetical protein                                                                                                                                                                  | 87%  | 14% |
|     | B | A | (3)-01784 | PF00490.15[RC3 ROK family]                                                                                                                                                            | 100% | 7%  |
|     | B | A | (3)-01785 | PF13377.1[Peripla_BP_3 Periplasmic binding protein-like domain];PF00356.16[LacI Bacterial regulatory proteins, lacI family];PF01381.17[HTH_3 Helix-turn-helix]                        | 100% | 5%  |
|     | B | A | (3)-01786 | TIGR01322[scrB_fam: sucrose-6-phosphate hydrolase];PF08244.7[Glyco_hydro_32C Glycosyl hydrolases family 32 C terminal]                                                                | 100% | 5%  |
| C43 | B | A | (3)-01787 | TIGR01996[PTS-II-BC-sucr: PTS system, sucrose-specific IIBC component];PF00358.15[PTS_EIIA_1 Phosphoenolpyruvate-dependent sugar phosphotransferase system, EIIA 1]                   | 100% | 7%  |
|     | B | A | (3)-01789 | PF00128.19[Alpha-amylase Alpha amylase, catalytic domain]                                                                                                                             | 100% | 7%  |
|     | B | A | (3)-01805 | PF00874.15[PRD PRD domain];PF05043.8[Mga Mga helix-turn-helix domain];PF00359.17[PTS_EIIA_2 Phosphoenolpyruvate-dependent sugar phosphotransferase system, EIIA 2]                    | 93%  | 9%  |
|     | B | A | (3)-01806 | PF00359.17[PTS_EIIA_2 Phosphoenolpyruvate-dependent sugar phosphotransferase system, EIIA 2]                                                                                          | 93%  | 9%  |
| C44 | B | A | (3)-01807 | PF02302.12[PTS_IIB PTS system, Lactose/Cellobiose specific IIB subunit]                                                                                                               | 93%  | 9%  |
|     | B | A | (3)-01808 | PF03611.9[EIIC-GAT PTS system sugar-specific permease component]                                                                                                                      | 93%  | 7%  |
|     | B | A | (3)-01809 | PF13580.1[SIS_2 SIS domain]                                                                                                                                                           | 93%  | 7%  |
|     | B | A | (3)-01860 | PF02302.12[PTS_IIB PTS system, Lactose/Cellobiose specific IIB subunit]                                                                                                               | 93%  | 0%  |
| C45 | B | A | (3)-01861 | PF00380.17[SIS(SIS domain)];PF01418.12[HTH_6 Helix-turn-helix domain, tpiR family]                                                                                                    | 93%  | 0%  |
|     | B | A | (3)-01862 | TIGR02004[PTS_IIBC-malK: PTS system, maltose and glucose-specific IIBC component];TIGR00826[EIIB_glc: PTS system, glucose-like IIB component]                                         | 93%  | 0%  |
|     | B | A | (3)-01863 | PF00155.16[Aminotran_1_2 Aminotransferase class I and II]                                                                                                                             | 100% | 0%  |
|     | B | A | (3)-01865 | PF13671.1[AAA_33 AAA domain];PF06414.7[Zeta_toxin Zeta toxin]                                                                                                                         | 100% | 0%  |
| C46 | B | A | (3)-01866 | PF00383.17[dCMP_cyt_deam_1 Cytidine and deoxycytidylate deaminase zinc-binding region]                                                                                                | 100% | 4%  |
|     | B | A | (3)-01908 | hypothetical protein                                                                                                                                                                  | 93%  | 4%  |
|     | B | A | (3)-01909 | PF09992.4[DUF2233 Predicted periplasmic protein (DUF2233)]                                                                                                                            | 93%  | 4%  |
|     | B | A | (3)-01910 | PF00535.21[Glycosyl_transf_2 Glycosyl transferase family 2];PF04138.9[GrA GrA-like protein]                                                                                           | 93%  | 4%  |
| C47 | B | A | (3)-01944 | PF13527.1[Acetyltransf_9 Acetyltransferase (GNAT) domain];PF00583.19[Acetyltransf_1 Acetyltransferase (GNAT) family]                                                                  | 100% | 0%  |
|     | B | A | (3)-01947 | hypothetical protein                                                                                                                                                                  | 100% | 0%  |
|     | B | A | (3)-02009 | hypothetical protein                                                                                                                                                                  | 93%  | 0%  |
|     | B | A | (3)-02010 | PF11131.3[DUF2974 Protein of unknown function (DUF2974)]                                                                                                                              | 100% | 0%  |
| C48 | B | A | (3)-02012 | hypothetical protein                                                                                                                                                                  | 100% | 0%  |
|     | B | A | (3)-02023 | hypothetical protein                                                                                                                                                                  | 100% | 0%  |
|     | B | A | (3)-02056 | PF00496.17[SBP_bac_5 Bacterial extracellular solute-binding proteins, family 5 Middle]                                                                                                | 100% | 5%  |
|     | B | A | (3)-02057 | PF00528.17[BPD_transp_1 Binding-protein-dependent transport system inner membrane component]                                                                                          | 100% | 5%  |
| C49 | B | A | (3)-02058 | PF00528.17[BPD_transp_1 Binding-protein-dependent transport system inner membrane component];PF12911.2[OppC_N N-terminal TM domain of oligopeptide transport permease C]              | 100% | 5%  |
|     | B | A | (3)-02059 | PF00005.22[ABC_tran ABC transporter];TIGR01727[oligo_HPY: oligopeptide/dipeptide ABC transporter, ATP-binding protein, C-terminal domain]                                             | 100% | 5%  |
|     | B | A | (3)-02060 | PF00005.22[ABC_tran ABC transporter];PF08352.7[oligo_HPY Oligopeptide/dipeptide transporter, C-terminal region]                                                                       | 100% | 5%  |
|     | B | A | (3)-02061 | PF01230.18[Hit HIT domain];PF11969.3[DcpS_C Scavenger mRNA decapping enzyme C-term binding]                                                                                           | 100% | 5%  |
| C50 | B | A | (3)-02065 | PF00293.23[NUDIX NUDIX domain]                                                                                                                                                        | 93%  | 0%  |
|     | B | A | (3)-02066 | hypothetical protein                                                                                                                                                                  | 93%  | 0%  |
|     | B | A | (3)-02085 | PF00228.26[DnaJ DnaJ domain]                                                                                                                                                          | 100% | 0%  |
|     | B | A | (3)-02086 | PF00753.22[Lactamase_B Metallo-beta-lactamase superfamily];PF12706.2[Lactamase_B_2 Beta-lactamase superfamily domain]                                                                 | 100% | 0%  |
| C51 | B | A | (3)-02260 | hypothetical protein                                                                                                                                                                  | 100% | 0%  |
|     | B | A | (3)-02302 | hypothetical protein                                                                                                                                                                  | 87%  | 0%  |
|     | B | A | (3)-02464 | PF05043.8[Mga Mga helix-turn-helix domain]                                                                                                                                            | 100% | 0%  |
|     | B | A | (3)-02465 | PF05043.8[Mga Mga helix-turn-helix domain]                                                                                                                                            | 100% | 0%  |
| C52 | B | A | (3)-02474 | hypothetical protein                                                                                                                                                                  | 100% | 0%  |
|     | B | A | (3)-02475 | hypothetical protein                                                                                                                                                                  | 87%  | 0%  |
|     | B | A | (3)-02477 | hypothetical protein                                                                                                                                                                  | 100% | 0%  |
|     | B | A | (3)-02478 | hypothetical protein                                                                                                                                                                  | 93%  | 0%  |
| C53 | B | A | (3)-02509 | hypothetical protein                                                                                                                                                                  | 93%  | 0%  |
|     | B | A | (3)-02510 | PF06013.7[WXG100 Proteins of 100 residues with WXG];TIGR03930[WXG100_ESAT6: WXG100 family type VII secretion target];PF10824.3[DUF2580 Protein of unknown function (DUF2580)]         | 87%  | 0%  |
|     | B | A | (3)-02511 | TIGR03929[T7_essa: Nterm: type VII secretion protein EsaA]                                                                                                                            | 87%  | 0%  |
|     | B | A | (3)-02512 | hypothetical protein                                                                                                                                                                  | 87%  | 0%  |
| C54 | B | A | (3)-02513 | PF08817.5[YukD WXG100 protein secretion system (Wss), protein YukD]                                                                                                                   | 87%  | 0%  |
|     | B | A | (3)-02515 | TIGR03926[T7_EssB: type VII secretion protein EssB];PF10140.4[YukC WXG100 protein secretion system (Wss), protein YukC]                                                               | 87%  | 0%  |
|     | B | A | (3)-02516 | PF01580.13[FtsK_SpoIIIE FtsK/SpoIIIE family];PF12846.2[AAA_10 AAA-like domain];TIGR03928[T7_EssCb: FtsK type VII secretion protein EssC]                                              | 87%  | 0%  |
|     | B | A | (3)-02525 | PF01832.15[Glucosaminidase Mannosyl-glycoprotein endo-beta-N-acetylglucosaminidase];PF07538.6[ChW Clostridial hydrophobic W]                                                          | 100% | 0%  |
| C55 | B | A | (3)-02550 | PF04892.7[VanZ VanZ like family]                                                                                                                                                      | 87%  | 4%  |
|     | B | A | (3)-02576 | PF00004.24[AAA ATPase family associated with various cellular activities (AAA)];PF00158.21[Sigma54_activat Sigma-54 interaction domain];PF07724.9[AAA_2 AAA domain (Cdc48 subfamily)] | 93%  | 13% |
|     | B | A | (3)-02636 | PF03009.12[GDPD Glycerophosphoryl diester phosphodiesterase family]                                                                                                                   | 93%  | 4%  |
|     | B | A | (3)-02648 | PF02525.12[Flavodoxin_2 Flavodoxin-like fold];PF03358.10[FMN_red NADPH-dependent FMN reductase]                                                                                       | 93%  | 2%  |
|     | B | A | (3)-02690 | hypothetical protein                                                                                                                                                                  | 100% | 0%  |
|     | B | A | (3)-02688 | PF01548.12[DEDD_Tnp_IS110 Transposase];PF02371.11[Transposase_20 Transposase IS116/IS110/IS902 family]                                                                                | 93%  | 9%  |
|     | B | A | (3)-02841 | hypothetical protein                                                                                                                                                                  | 100% | 0%  |
|     | B | A | (3)-02866 | TIGR00410[lacE: PTS system, lactose/cellobiose family IIC component];PF02378.13[PTS_EIIC Phosphotransferase system, EIIC]                                                             | 100% | 0%  |
|     | B | A | (3)-02871 | PF05043.8[Mga Mga helix-turn-helix domain];PF08280.6[HTH_Mga M protein trans-acting positive regulator (MGA) HTH domain]                                                              | 100% | 0%  |
|     | B | A | (3)-02872 | hypothetical protein                                                                                                                                                                  | 100% | 0%  |
| C54 | B | A | (3)-02873 | hypothetical protein                                                                                                                                                                  | 100% | 0%  |
|     | B | A | (3)-02874 | hypothetical protein                                                                                                                                                                  | 100% | 0%  |
|     | B | A | (3)-02875 | hypothetical protein                                                                                                                                                                  | 100% | 0%  |
|     | B | A | (3)-02875 | hypothetical protein                                                                                                                                                                  | 100% | 0%  |

|         | B       | A       | (3)-02876             | PF11797.3[DUF3324[Protein of unknown function C-terminal (DUF3324)];PF06030.7[DUF916[Bacterial protein of unknown function (DUF916)]]                              | 100%                | 0%                  |
|---------|---------|---------|-----------------------|--------------------------------------------------------------------------------------------------------------------------------------------------------------------|---------------------|---------------------|
|         | B       | A       | (3)-02878             | hypothetical protein                                                                                                                                               | 87%                 | 4%                  |
|         | B       | A       | (3)-02890             | hypothetical protein                                                                                                                                               | 100%                | 0%                  |
|         | B       | A       | (4)-01523             | PF00874.15[PRD[PRD domain]]                                                                                                                                        | 87%                 | 13%                 |
|         | B       | A       | (4)-02162             | PF00085.15[Thioredoxin[Thioredoxin]]                                                                                                                               | 87%                 | 0%                  |
|         | B       | A       | (4)-04231             | hypothetical protein                                                                                                                                               | 87%                 | 18%                 |
| Cluster | Group 1 | Group 2 | GeneID in ref. genome | Function or Pfam*                                                                                                                                                  | Fraction of group 1 | Fraction of group 2 |
|         | A1      | A2      | (1)-00507             | PF02586.9[DUF159[Uncharacterised ACR, COG2135]]                                                                                                                    | 95%                 | 0%                  |
|         | A1      | A2      | (1)-00584             | hypothetical protein                                                                                                                                               | 81%                 | 17%                 |
|         | A1      | A2      | (1)-00676             | PF00004.24[AAA[ATPase family associated with various cellular activities (AAA)];PF00158.21[Sigma54_activa[Sigma-54 interaction domain];PF00874.15[PRD[PRD domain]] | 90%                 | 17%                 |
|         | A1      | A2      | (1)-00677             | PF03610.11[EIIA-man[PTS system fructose IIA component]]                                                                                                            | 90%                 | 17%                 |
|         | A1      | A2      | (1)-00678             | PF03830.10[PTSII sorb[PTS system sorbose subfamily IIB component]]                                                                                                 | 90%                 | 17%                 |
|         | A1      | A2      | (1)-00679             | PF03609.9[EII-Sor[PTS system sorbose-specific ic component]]                                                                                                       | 90%                 | 17%                 |
|         | A1      | A2      | (1)-00680             | PF03613.9[EIIID-AGA[PTS system mannose/fructose/sorbose family IID component]]                                                                                     | 90%                 | 17%                 |
|         | A1      | A2      | (1)-00681             | hypothetical protein                                                                                                                                               | 90%                 | 17%                 |
|         | A1      | A2      | (1)-00682             | PF11175.3[DUF2961[Protein of unknown function (DUF2961)]]                                                                                                          | 90%                 | 17%                 |
|         | A1      | A2      | (1)-00683             | PF00480.15[ROK[ROK family]]                                                                                                                                        | 90%                 | 17%                 |
|         | A1      | A2      | (1)-00684             | PF01381.17[HTH_3[Helix-turn-helix];PF12844.2[HTH_19[Helix-turn-helix domain]]                                                                                      | 90%                 | 17%                 |
|         | A1      | A2      | (1)-00685             | PF01381.17[HTH_3[Helix-turn-helix]]                                                                                                                                | 90%                 | 0%                  |
|         | A1      | A2      | (1)-00686             | PF02486.14[Rep_trans[Replication initiation factor]]                                                                                                               | 90%                 | 17%                 |
|         | A1      | A2      | (1)-00687             | PF11372.3[DUF3173[Domain of unknown function (DUF3173)]]                                                                                                           | 90%                 | 17%                 |
|         | A1      | A2      | (1)-00688             | PF00847.15[AP2[AP2 domain];PF00589.17[Phage_integrase[Phage integrase family]]                                                                                     | 90%                 | 17%                 |
|         | A1      | A2      | (1)-00793             | PF00589.17[Phage_integrase[Phage integrase family]]                                                                                                                | 95%                 | 14%                 |
|         | A1      | A2      | (1)-00794             | hypothetical protein                                                                                                                                               | 95%                 | 0%                  |
|         | A1      | A2      | (1)-00795             | hypothetical protein                                                                                                                                               | 95%                 | 0%                  |
|         | A1      | A2      | (1)-00796             | hypothetical protein                                                                                                                                               | 95%                 | 0%                  |
|         | A1      | A2      | (1)-00797             | PF00851.4[SHC-T[Short C-terminal domain]]                                                                                                                          | 95%                 | 0%                  |
|         | A1      | A2      | (1)-00803             | PF05595.6[DUF771[Domain of unknown function (DUF771)]]                                                                                                             | 90%                 | 9%                  |
|         | A1      | A2      | (1)-00805             | hypothetical protein                                                                                                                                               | 90%                 | 14%                 |
|         | A1      | A2      | (1)-01146             | hypothetical protein                                                                                                                                               | 90%                 | 0%                  |
|         | A1      | A2      | (1)-01259             | PF01548.12[DEDD_Tnp_IS110[Transposase];PF02371.11[Transposase_20[Transposase IS116/IS110/IS902 family]]                                                            | 100%                | 14%                 |
|         | A1      | A2      | (1)-01409             | PF01527.15[HTH_Tnp_1[Transposase];PF13518.1[HTH_28[Helix-turn-helix domain];PF01710.11[HTH_Tnp_IS630[Transposase]]                                                 | 95%                 | 14%                 |
|         | A1      | A2      | (1)-01451             | PF06378.6[DUF1071[Protein of unknown function (DUF1071)]]                                                                                                          | 90%                 | 17%                 |
|         | A1      | A2      | (1)-01502             | hypothetical protein                                                                                                                                               | 86%                 | 3%                  |
|         | A1      | A2      | (1)-01510             | PF03960.10[ArsC[ArsC family];TIGR01617[arsC_related: transcriptional regulator, Spx/MgsR family]]                                                                  | 86%                 | 17%                 |
|         | A1      | A2      | (1)-01512             | hypothetical protein                                                                                                                                               | 86%                 | 14%                 |
|         | A1      | A2      | (1)-01513             | hypothetical protein                                                                                                                                               | 86%                 | 17%                 |
|         | A1      | A2      | (1)-01678             | hypothetical protein                                                                                                                                               | 81%                 | 17%                 |
|         | A1      | A2      | (1)-01679             | hypothetical protein                                                                                                                                               | 81%                 | 17%                 |
|         | A1      | A2      | (1)-01680             | hypothetical protein                                                                                                                                               | 81%                 | 17%                 |
|         | A1      | A2      | (1)-01683             | PF04276.7[DUF443[Protein of unknown function (DUF443)]]                                                                                                            | 81%                 | 14%                 |
|         | A1      | A2      | (1)-01685             | hypothetical protein                                                                                                                                               | 81%                 | 14%                 |
|         | A1      | A2      | (1)-01806             | PF00126.22[HTH_1[Bacterial regulatory helix-turn-helix protein, lysR family];PF01022.15[HTH_5[Bacterial regulatory protein, arsR family]]                          | 86%                 | 17%                 |
|         | A1      | A2      | (1)-01809             | PF05043.8[Mga[Mga helix-turn-helix domain];PF08279.7[HTH_11[HTH domain];PF08280.6[HTH_MgaM protein trans-acting positive regulator (MGA) HTH domain]]              | 86%                 | 17%                 |
|         | A1      | A2      | (1)-01810             | hypothetical protein                                                                                                                                               | 86%                 | 17%                 |
|         | A1      | A2      | (1)-01811             | hypothetical protein                                                                                                                                               | 86%                 | 17%                 |
|         | A1      | A2      | (1)-02179             | PF07470.8[Glyco_hydro_88[Glycosyl Hydrolase Family 88]]                                                                                                            | 90%                 | 6%                  |
|         | A1      | A2      | (1)-02180             | PF10222.4[DUF2264[Uncharacterized protein conserved in bacteria (DUF2264)]]                                                                                        | 90%                 | 6%                  |
|         | A1      | A2      | (1)-02181             | PF02470.8[Glyco_hydro_88[Glycosyl Hydrolase Family 88]]                                                                                                            | 90%                 | 6%                  |
|         | A1      | A2      | (1)-02182             | PF00528.17[IBPD_transp_1[Binding-protein-dependent transport system inner membrane component]]                                                                     | 90%                 | 6%                  |
|         | A1      | A2      | (1)-02183             | PF00528.17[IBPD_transp_1[Binding-protein-dependent transport system inner membrane component]]                                                                     | 90%                 | 6%                  |
|         | A1      | A2      | (1)-02184             | PF13416.1[SBP_bac_8[Bacterial extracellular solute-binding protein];PF01547.20[SBP_bac_1[Bacterial extracellular solute-binding protein]]                          | 90%                 | 6%                  |
|         | A1      | A2      | (1)-02185             | PF12833.2[HTH_18[Helix-turn-helix domain];PF0165.18[HTH_AraC[Bacterial regulatory helix-turn-helix proteins, AraC family]]                                         | 90%                 | 6%                  |
|         | A1      | A2      | (1)-02683             | PF10551.4[MULEE[MULE transposase domain];PF00872.13[Transposase_mut[Transposase, Mutator family]]                                                                  | 100%                | 14%                 |
|         | A1      | A2      | (5)-00309             | hypothetical protein                                                                                                                                               | 81%                 | 9%                  |
| Cluster | Group 1 | Group 2 | GeneID in ref. genome | Function or Pfam*                                                                                                                                                  | Fraction of group 1 | Fraction of group 2 |
|         | A1      | B       | (1)-00033             | hypothetical protein                                                                                                                                               | 100%                | 7%                  |
|         | A1      | B       | (1)-00034             | hypothetical protein                                                                                                                                               | 100%                | 7%                  |
|         | A1      | B       | (1)-00035             | hypothetical protein                                                                                                                                               | 100%                | 7%                  |
|         | A1      | B       | (1)-00036             | hypothetical protein                                                                                                                                               | 100%                | 0%                  |
|         | A1      | B       | (1)-00037             | PF13242.1[Hydrolase_like[HAD-hydrolase-like];PF00702.21[Hydrolase[haloacid dehalogenase-like hydrolase]]                                                           | 100%                | 7%                  |
|         | A1      | B       | (1)-00038             | PF00392.16[GntR[Bacterial regulatory proteins, gntR family];PF00455.17[DeoRC[DeoR C terminal sensor domain]]                                                       | 100%                | 7%                  |
|         | A1      | B       | (1)-00039             | PF0232.13[Glyco_hydro_1[Glycosyl hydrolase family 1];TIGR01233[lacG: 6-phospho-beta-galactosidase]]                                                                | 100%                | 7%                  |
|         | A1      | B       | (1)-00040             | PF02255.11[PTS_IIA[PTS system, Lactose/Cellobiose specific IIA subunit]]                                                                                           | 100%                | 7%                  |
|         | A1      | B       | (1)-00041             | TIGR00853[pts-lac: PTS system, lactose/cellobiose family IIB component];PF02302.12[PTS_IIB[PTS system, Lactose/Cellobiose specific IIB subunit]]                   | 100%                | 7%                  |
|         | A1      | B       | (1)-00042             | PF00150.13[Cellulase[Cellulase (glycosyl hydrolase family 5)];PF07745.8[Glyco_hydro_53[Glycosyl hydrolase family 53]]                                              | 100%                | 7%                  |
|         | A1      | B       | (1)-00149             | hypothetical protein                                                                                                                                               | 100%                | 0%                  |
|         | A1      | B       | (1)-00226             | PF12910.2[RelB_N[Antitoxin of toxin-antitoxin stability system N-terminal]]                                                                                        | 100%                | 7%                  |
|         | A1      | B       | (1)-00227             | PF06769.8[Plasmid_Txe[Plasmid encoded toxin Txe];PF05016.9[Plasmid_stabil[Plasmid stabilisation system protein]]                                                   | 100%                | 7%                  |
|         | A1      | B       | (1)-00228             | hypothetical protein                                                                                                                                               | 100%                | 7%                  |
|         | A1      | B       | (1)-00229             | hypothetical protein                                                                                                                                               | 100%                | 0%                  |
|         | A1      | B       | (1)-00311             | hypothetical protein                                                                                                                                               | 86%                 | 0%                  |
|         | A1      | B       | (1)-00329             | PF13527.1[Acetyltransf_9[Acetyltransferase (GNAT) domain]]                                                                                                         | 86%                 | 0%                  |
|         | A1      | B       | (1)-00353             | PF08279.7[HTH_11[HTH domain]]                                                                                                                                      | 95%                 | 0%                  |
|         | A1      | B       | (1)-00368             | PF00232.13[Glyco_hydro_1[Glycosyl hydrolase family 1]]                                                                                                             | 95%                 | 0%                  |
|         | A1      | B       | (1)-00369             | PF08279.7[HTH_11[HTH domain];PF08280.6[HTH_MgaM protein trans-acting positive regulator (MGA) HTH domain]]                                                         | 95%                 | 0%                  |
|         | A1      | B       | (1)-00370             | PF00358.15[PTS_EIIA_1[phosphoenolpyruvate-dependent sugar phosphotransferase system, EIIA 1];PF00232.13[Glyco_hydro_1[Glycosyl hydrolase family 1]]                | 95%                 | 0%                  |
|         | A1      | B       | (1)-00371             | PF00232.13[Glyco_hydro_1[Glycosyl hydrolase family 1]]                                                                                                             | 95%                 | 0%                  |
|         | A1      | B       | (1)-00476             | hypothetical protein                                                                                                                                               | 90%                 | 0%                  |
|         | A1      | B       | (1)-00507             | PF02586.9[DUF159[Uncharacterised ACR, COG2135]]                                                                                                                    | 95%                 | 0%                  |
|         | A1      | B       | (1)-00511             | hypothetical protein                                                                                                                                               | 95%                 | 0%                  |
|         | A1      | B       | (1)-00512             | hypothetical protein                                                                                                                                               | 95%                 | 0%                  |
|         | A1      | B       | (1)-00565             | PF00589.17[Phage_integrase[Phage integrase family]]                                                                                                                | 95%                 | 7%                  |
|         | A1      | B       | (1)-00566             | PF12844.2[HTH_19[Helix-turn-helix domain];PF01381.17[HTH_3[Helix-turn-helix]]                                                                                      | 95%                 | 7%                  |
|         | A1      | B       | (1)-00567             | TIGR01764[excise: DNA binding domain, excisionase family];PF12728.2[HTH_17[Helix-turn-helix domain]]                                                               | 95%                 | 7%                  |
|         | A1      | B       | (1)-00568             | hypothetical protein                                                                                                                                               | 95%                 | 7%                  |
|         | A1      | B       | (1)-00569             | PF13560.1[HTH_31[Helix-turn-helix domain];PF01381.17[HTH_3[Helix-turn-helix];PF12844.2[HTH_19[Helix-turn-helix domain]]                                            | 90%                 | 13%                 |
|         | A1      | B       | (1)-00570             | PF13443.1[HTH_26[Cro/C1-type HTH DNA-binding domain];PF01381.17[HTH_3[Helix-turn-helix];PF12844.2[HTH_19[Helix-turn-helix domain]]                                 | 95%                 | 13%                 |
|         | A1      | B       | (1)-00571             | PF13248.1[zf-ribbon_3[Zinc-ribbon domain]]                                                                                                                         | 95%                 | 13%                 |
|         | A1      | B       | (1)-00572             | hypothetical protein                                                                                                                                               | 95%                 | 13%                 |
|         | A1      | B       | (1)-00573             | hypothetical protein                                                                                                                                               | 95%                 | 13%                 |
|         | A1      | B       | (1)-00580 (1)-01762   | PF05598.6[DUF772.2[Transposase domain (DUF772)];PF01609.16[DD_E_Tnp_1[Transposase DDE domain];PF13751.1[DD_E_Tnp_1_6[Transposase DDE domain]]                      | 100%                | 0%                  |
|         | A1      | B       | (1)-00584             | hypothetical protein                                                                                                                                               | 81%                 | 7%                  |
|         | A1      | B       | (1)-00676             | PF00004.24[AAA[ATPase family associated with various cellular activities (AAA)];PF00158.21[Sigma54_activa[Sigma-54 interaction domain];PF00874.15[PRD[PRD domain]] | 90%                 | 0%                  |
|         | A1      | B       | (1)-00677             | PF03610.11[EIIA-man[PTS system fructose IIA component]]                                                                                                            | 90%                 | 0%                  |
|         | A1      | B       | (1)-00678             | PF03830.10[PTSII sorb[PTS system sorbose subfamily IIB component]]                                                                                                 | 90%                 | 0%                  |
|         | A1      | B       | (1)-00679             | PF03609.9[EII-Sor[PTS system sorbose-specific ic component]]                                                                                                       | 90%                 | 0%                  |
|         | A1      | B       | (1)-00680             | PF03613.9[EIIID-AGA[PTS system mannose/fructose/sorbose family IID component]]                                                                                     | 90%                 | 0%                  |
|         | A1      | B       | (1)-00681             | hypothetical protein                                                                                                                                               | 90%                 | 0%                  |

|    |    |                     |                                                                                                                                                                                                                              |                                                          |     |    |
|----|----|---------------------|------------------------------------------------------------------------------------------------------------------------------------------------------------------------------------------------------------------------------|----------------------------------------------------------|-----|----|
| C6 | A1 | B                   | (1)-00682                                                                                                                                                                                                                    | PF11175.3[DUF2961[Protein of unknown function (DUF2961)] | 90% | 0% |
|    | A1 | B                   | (1)-00683                                                                                                                                                                                                                    | PF00480.15[ROK[ROK family]                               | 90% | 0% |
| A1 | B  | (1)-00684           | PF01381.17[HTH_3[Helix-turn-helix];PF12844.2[HTH_19[Helix-turn-helix domain]                                                                                                                                                 | 90%                                                      | 7%  |    |
| A1 | B  | (1)-00685           | PF01381.17[HTH_3[Helix-turn-helix]                                                                                                                                                                                           | 90%                                                      | 0%  |    |
| A1 | B  | (1)-00686           | PF02486.14[Rep_trans[Replication initiation factor]                                                                                                                                                                          | 90%                                                      | 0%  |    |
| A1 | B  | (1)-00687           | PF11372.3[DUF3173[Domain of unknown function (DUF3173)]                                                                                                                                                                      | 90%                                                      | 0%  |    |
| A1 | B  | (1)-00688           | PF00847.15[AP2[AP2 domain];PF00589.17[Phage_integrase[Phage integrase family]                                                                                                                                                | 90%                                                      | 0%  |    |
| A1 | B  | (1)-00693           | hypothetical protein                                                                                                                                                                                                         | 100%                                                     | 0%  |    |
| A1 | B  | (1)-00793 (1)-01466 | PF00689.17[Phage_integrase[Phage integrase family]                                                                                                                                                                           | 95%                                                      | 13% |    |
| A1 | B  | (1)-00794 (1)-01465 | hypothetical protein                                                                                                                                                                                                         | 95%                                                      | 0%  |    |
| A1 | B  | (1)-00796 (1)-01463 | hypothetical protein                                                                                                                                                                                                         | 95%                                                      | 7%  |    |
| A1 | B  | (1)-00805 (1)-01454 | hypothetical protein                                                                                                                                                                                                         | 90%                                                      | 0%  |    |
| A1 | B  | (1)-00849 (1)-01410 | PF13333.1[rve_2[Integrase core domain];PF00665.21[rve[Integrase core domain];PF13276.1[HTH_21[HTH-like domain]                                                                                                               | 90%                                                      | 0%  |    |
| A1 | B  | (1)-00850           | PF01527.15[HTH_Tnp_1[Transposase];PF13518.1[HTH_28[Helix-turn-helix domain];PF01710.11[HTH_Tnp_IS630[Transposase]                                                                                                            | 95%                                                      | 0%  |    |
| A1 | B  | (1)-00944           | hypothetical protein                                                                                                                                                                                                         | 95%                                                      | 0%  |    |
| A1 | B  | (1)-00998           | hypothetical protein                                                                                                                                                                                                         | 100%                                                     | 0%  |    |
| A1 | B  | (1)-01075           | hypothetical protein                                                                                                                                                                                                         | 95%                                                      | 0%  |    |
| A1 | B  | (1)-01076           | hypothetical protein                                                                                                                                                                                                         | 100%                                                     | 0%  |    |
| A1 | B  | (1)-01143 (1)-01144 | hypothetical protein                                                                                                                                                                                                         | 100%                                                     | 0%  |    |
| A1 | B  | (1)-01146           | hypothetical protein                                                                                                                                                                                                         | 90%                                                      | 0%  |    |
| A1 | B  | (1)-01147           | hypothetical protein                                                                                                                                                                                                         | 95%                                                      | 0%  |    |
| A1 | B  | (1)-01259 (1)-01518 | PF01548.12[DEDD_Tnp_IS110[Transposase];PF02371.11[Transposase_20[Transposase IS116/IS110/IS902 family]                                                                                                                       | 100%                                                     | 0%  |    |
| A1 | B  | (1)-01276           | hypothetical protein                                                                                                                                                                                                         | 100%                                                     | 0%  |    |
| A1 | B  | (1)-01279           | PTS system, IICBA component / PF00358.15[PTS_EIIA_1[phosphoenolpyruvate-dependent sugar phosphotransferase system, EIIA 1];TIGR00830[PTBA: PTS system, glucose subfamily, IIA component]                                     | 100%                                                     | 0%  |    |
| A1 | B  | (1)-01280           | glycosyl hydrolase family protein / PF02056.11[Glyco_hydro_4[Family 4, glycosyl hydrolase]                                                                                                                                   | 100%                                                     | 0%  |    |
| A1 | B  | (1)-01281           | PTS system, N-acetylglucosamine-specific IIBC component / PF02378.13[PTS_EIIC[Phosphotransferase system, EIIC                                                                                                                | 100%                                                     | 0%  |    |
| A1 | B  | (1)-01282           | PF04794.7[YjC[17jC-like protein]                                                                                                                                                                                             | 90%                                                      | 0%  |    |
| A1 | B  | (1)-01283           | BglG family transcriptional antiterminal / PF00874.15[PRD[PRD domain]                                                                                                                                                        | 95%                                                      | 0%  |    |
| A1 | B  | (1)-01384 (1)-01885 | PF01610.12[DEE_Tnp_ISL3[Transposase]                                                                                                                                                                                         | 100%                                                     | 0%  |    |
| A1 | B  | (1)-01411 (1)-00848 | PF01527.15[HTH_Tnp_1[Transposase];PF13518.1[HTH_28[Helix-turn-helix domain]                                                                                                                                                  | 90%                                                      | 0%  |    |
| A1 | B  | (1)-01451 (1)-00808 | PF06378.6[DUF1071[Protein of unknown function (DUF1071)]                                                                                                                                                                     | 90%                                                      | 13% |    |
| A1 | B  | (1)-01456 (1)-00803 | PF05595.6[DUF771[Domain of unknown function (DUF771)]                                                                                                                                                                        | 90%                                                      | 13% |    |
| A1 | B  | (1)-01462 (1)-01461 | PF09851.4[SHOCT[Short C-terminal domain]                                                                                                                                                                                     | 95%                                                      | 7%  |    |
| A1 | B  | (1)-01464 (1)-00795 | hypothetical protein                                                                                                                                                                                                         | 95%                                                      | 0%  |    |
| A1 | B  | (1)-01489           | hypothetical protein                                                                                                                                                                                                         | 95%                                                      | 0%  |    |
| A1 | B  | (1)-01493           | PF13242.1[Hydrolase_like[HAD-hydrolase-like];PF00702.21[Hydrolase[haloacetal dehalogenase-like hydrolase]                                                                                                                    | 95%                                                      | 13% |    |
| A1 | B  | (1)-01494           | TIGR00695[uxuA: mannuronate dehydratase];PF03786.8[UxuA[D-mannuronate dehydratase (UxuA)];PF01261.19[AP_endonuc_2[Xylose isomerase-like TIM barrel]                                                                          | 95%                                                      | 13% |    |
| A1 | B  | (1)-01496 (1)-01497 | PF03610.11[EIIA_man[PTS system fructose IIA component]                                                                                                                                                                       | 95%                                                      | 13% |    |
| A1 | B  | (1)-01498           | hypothetical protein                                                                                                                                                                                                         | 95%                                                      | 13% |    |
| A1 | B  | (1)-01498           | PF03830.10[PTSIIb_sorb[PTS system sorbose subfamily IIB component]                                                                                                                                                           | 95%                                                      | 13% |    |
| A1 | B  | (1)-01499           | PF03613.9[EIID-AGA[PTS system mannose/fructose/sorbose family IID component]                                                                                                                                                 | 95%                                                      | 13% |    |
| A1 | B  | (1)-01500           | PF03609.9[EIIL-Sor[PTS system sorbose-specific iic component]                                                                                                                                                                | 95%                                                      | 13% |    |
| A1 | B  | (1)-01501           | PF13685.1[Fe-ADH_2[Iron-containing alcohol dehydrogenase];PF00465.14[Fe-ADH[Iron-containing alcohol dehydrogenase]                                                                                                           | 95%                                                      | 13% |    |
| A1 | B  | (1)-01502           | hypothetical protein                                                                                                                                                                                                         | 86%                                                      | 0%  |    |
| A1 | B  | (1)-01503           | PF00389.25[2-Hacid_dh[D-isomer specific 2-hydroxyacid dehydrogenase, catalytic domain]                                                                                                                                       | 95%                                                      | 13% |    |
| A1 | B  | (1)-01504           | TIGR00872[gnr_rel_6: phosphogluconate dehydrogenase (decarboxylating)]                                                                                                                                                       | 95%                                                      | 13% |    |
| A1 | B  | (1)-01505           | PF13580.1[SIS_2[SIS domain];PF01380.17[SIS[SIS domain];PF01418.12[HTH_6[Helix-turn-helix domain, rpiR family]                                                                                                                | 95%                                                      | 13% |    |
| A1 | B  | (1)-01512 (1)-01511 | hypothetical protein                                                                                                                                                                                                         | 86%                                                      | 13% |    |
| A1 | B  | (1)-01516           | PF00923.14[Transaldolase[Transaldolase]                                                                                                                                                                                      | 95%                                                      | 13% |    |
| A1 | B  | (1)-01517           | PF03829.8[PTSIIa_gutA[PTS system glucitol/sorbitol-specific IIA component];PF00923.14[Transaldolase[Transaldolase]                                                                                                           | 95%                                                      | 13% |    |
| A1 | B  | (1)-01519           | PF07863.6[EIIBC-GUT_C[Sorbitol phosphotransferase enzyme II C-terminus];TIGR00825[EIIBC-GUT: PTS system, glucitol/sorbitol-specific, IIBC component];PF03612.9[EIIBC-GUT_N[Sorbitol phosphotransferase enzyme II N-terminus] | 95%                                                      | 13% |    |
| A1 | B  | (1)-01520           | TIGR00821[EIIL-GUT: PTS system, glucitol/sorbitol-specific, IIC component];PF03608.8[EIIL-GUT[PTS system enzyme II sorbitol-specific factor]                                                                                 | 95%                                                      | 13% |    |
| A1 | B  | (1)-01521           | TIGR00821[EIIL-GUT: PTS system, glucitol/sorbitol-specific, IIC component];PF03608.8[EIIL-GUT[PTS system enzyme II sorbitol-specific factor];PF06923.6[GuM[Glucitol operon activator protein (GuM)]                          | 95%                                                      | 13% |    |
| A1 | B  | (1)-01522           | PF00874.15[PRD[PRD domain];PF05043.8[Mga[Mga helix-turn-helix domain];PF00359.17[PTS_EIIA_2[Phosphoenolpyruvate-dependent sugar phosphotransferase system, EIIA 2]                                                           | 95%                                                      | 13% |    |
| A1 | B  | (1)-01523           | PF13561.1[adh_short_C2[Enoyl-(Acyl carrier protein) reductase];PF08659.5[KR[KR domain];PF00106.20[adh_short[short chain dehydrogenase];PF01370.16[Epimerase[NAD dependent epimerase/dehydratase family]                      | 95%                                                      | 13% |    |
| A1 | B  | (1)-01595           | PF01909.18[NTP_transf_2[Nucleotidyltransferase domain]                                                                                                                                                                       | 81%                                                      | 0%  |    |
| A1 | B  | (1)-01677           | hypothetical protein                                                                                                                                                                                                         | 100%                                                     | 0%  |    |
| A1 | B  | (1)-01678           | hypothetical protein                                                                                                                                                                                                         | 81%                                                      | 0%  |    |
| A1 | B  | (1)-01679           | hypothetical protein                                                                                                                                                                                                         | 81%                                                      | 0%  |    |
| A1 | B  | (1)-01680           | hypothetical protein                                                                                                                                                                                                         | 81%                                                      | 0%  |    |
| A1 | B  | (1)-01683           | PF04276.7[DUF443[Protein of unknown function (DUF443)]                                                                                                                                                                       | 81%                                                      | 0%  |    |
| A1 | B  | (1)-01684           | hypothetical protein                                                                                                                                                                                                         | 81%                                                      | 0%  |    |
| A1 | B  | (1)-01685           | hypothetical protein                                                                                                                                                                                                         | 81%                                                      | 0%  |    |
| A1 | B  | (1)-01766 (1)-01763 | PF02275.13[CBAH[Linear amide C-N hydrolases, choloylglycine hydrolase family]                                                                                                                                                | 100%                                                     | 0%  |    |
| A1 | B  | (1)-01798           | hypothetical protein                                                                                                                                                                                                         | 100%                                                     | 0%  |    |
| A1 | B  | (1)-01806           | PF00126.22[HTH_1[Bacterial regulatory helix-turn-helix protein, lysR family];PF01022.15[HTH_5[Bacterial regulatory protein, arsR family]                                                                                     | 86%                                                      | 0%  |    |
| A1 | B  | (1)-01889           | PF13630.1[Sdp][Sdp/YhfL protein family]                                                                                                                                                                                      | 90%                                                      | 13% |    |
| A1 | B  | (1)-01960 (1)-01827 | hypothetical protein                                                                                                                                                                                                         | 90%                                                      | 0%  |    |
| A1 | B  | (1)-01985 (1)-00014 | PF03050.9[DEE_Tnp_IS66[Transposase IS66 family];PF13005.2[HTH_Tnp_IS66[putative Helix-turn-helix domain of transposase IS66]                                                                                                 | 90%                                                      | 0%  |    |
| A1 | B  | (1)-01986 (1)-01959 | PF05717.8[TnpB_IS66[IS66 Orf2 like protein]                                                                                                                                                                                  | 86%                                                      | 0%  |    |
| A1 | B  | (1)-02170           | hypothetical protein                                                                                                                                                                                                         | 100%                                                     | 0%  |    |
| A1 | B  | (1)-02171           | PF00005.22[ABC_tran[ABC transporter];PF13304.1[AAA_21[AAA domain]                                                                                                                                                            | 100%                                                     | 0%  |    |
| A1 | B  | (1)-02179           | PF07470.8[Glyco_hydro_88[Glucosyl Hydrolase Family 88]                                                                                                                                                                       | 90%                                                      | 0%  |    |
| A1 | B  | (1)-02180           | PF10022.4[DUF2264[Uncharacterized protein conserved in bacteria (DUF2264)]                                                                                                                                                   | 90%                                                      | 0%  |    |
| A1 | B  | (1)-02181           | PF07470.8[Glyco_hydro_88[Glucosyl Hydrolase Family 88]                                                                                                                                                                       | 90%                                                      | 0%  |    |
| A1 | B  | (1)-02182           | PF00528.17[BPD_transp_1[Binding-protein-dependent transport system inner membrane component]                                                                                                                                 | 90%                                                      | 0%  |    |
| A1 | B  | (1)-02183           | PF00528.17[BPD_transp_1[Binding-protein-dependent transport system inner membrane component]                                                                                                                                 | 90%                                                      | 0%  |    |
| A1 | B  | (1)-02184           | PF13416.1[SBP_bac_8[Bacterial extracellular solute-binding protein];PF01547.20[SBP_bac_1[Bacterial extracellular solute-binding protein]                                                                                     | 90%                                                      | 0%  |    |
| A1 | B  | (1)-02185           | PF12833.2[HTH_18[Helix-turn-helix domain];PF00165.18[HTH_AraC[Bacterial regulatory helix-turn-helix proteins, AraC family]                                                                                                   | 90%                                                      | 0%  |    |
| A1 | B  | (1)-02294           | PF00805.17[Pentapeptide repeats (8 copies)];PF13599.1[Pentapeptide_4[Pentapeptide repeats (9 copies)]                                                                                                                        | 100%                                                     | 0%  |    |
| A1 | B  | (1)-02295           | PF02517.11[Abj[CAAX protease self-immunity]                                                                                                                                                                                  | 100%                                                     | 0%  |    |
| A1 | B  | (1)-02306 (1)-02305 | PF00689.19[Acyl_transf_1[Acyltransferase (GNAT) family]                                                                                                                                                                      | 100%                                                     | 0%  |    |
| A1 | B  | (1)-02414 (1)-01480 | PF06114.8[DUF955[Domain of unknown function (DUF955)]                                                                                                                                                                        | 95%                                                      | 13% |    |
| A1 | B  | (1)-02430           | bacteriocin-type signal sequence                                                                                                                                                                                             | 100%                                                     | 0%  |    |
| A1 | B  | (1)-02431           | PF01721.13[Bacteriocin_II[Class II bacteriocin];PF08951.5[EntA_Imm[Enterocin A Immunity]                                                                                                                                     | 100%                                                     | 0%  |    |
| A1 | B  | (1)-02432           | PF01721.13[Bacteriocin_II[Class II bacteriocin]                                                                                                                                                                              | 100%                                                     | 0%  |    |
| A1 | B  | (1)-02463           | PF01061.19[ABC2_membrane[ABC-2 type transporter];PF12698.2[ABC2_membrane_3[ABC-2 family transporter protein]                                                                                                                 | 100%                                                     | 0%  |    |
| A1 | B  | (1)-02464           | PF12698.2[ABC2_membrane_3[ABC-2 family transporter protein]                                                                                                                                                                  | 100%                                                     | 0%  |    |
| A1 | B  | (1)-02465           | PF00005.22[ABC_tran[ABC transporter];PF13304.1[AAA_21[AAA domain]                                                                                                                                                            | 100%                                                     | 0%  |    |
| A1 | B  | (1)-02466           | PF07730.8[HiskA_3[Histidine kinase];PF02518.21[HatPase_c[Histidine kinase-, DNA gyrase B-, and HSP90-like ATPase]                                                                                                            | 100%                                                     | 0%  |    |
| A1 | B  | (1)-02467           | PF00196.14[GerE[Bacterial regulatory proteins, luxR family];PF00072.19[Response_reg[Response regulator receiver domain]                                                                                                      | 100%                                                     | 0%  |    |
| A1 | B  | (1)-02468           | hypothetical protein                                                                                                                                                                                                         | 100%                                                     | 0%  |    |
| A1 | B  | (1)-02498           | hypothetical protein                                                                                                                                                                                                         | 90%                                                      | 0%  |    |
| A1 | B  | (1)-02509           | PF00005.22[ABC_tran[ABC transporter];PF13304.1[AAA_21[AAA domain];PF12848.2[ABC_tran_2[ABC transporter]                                                                                                                      | 100%                                                     | 0%  |    |
| A1 | B  | (1)-02577           | PF05738.8[Cna_B[Cna protein B-type domain];TIGR01167[LPXTG_anchor.LPXTG-motif cell wall anchor domain]                                                                                                                       | 100%                                                     | 0%  |    |
| A1 | B  | (1)-02578           | hypothetical protein                                                                                                                                                                                                         | 95%                                                      | 0%  |    |
| A1 | B  | (1)-02582           | PF02012.15[BNR[BNR/Asp-box repeat]                                                                                                                                                                                           | 100%                                                     | 0%  |    |
| A1 | B  | (1)-02673           | PF13460.1[NAD_binding_10[NAD(PH)-binding];PF08659.5[KR[KR domain];PF08643.5[DUF1776[Fungal family of unknown function (DUF1776)];PF13561.1[adh_short_C2[Enoyl-(Acyl carrier protein) reductase]                              | 100%                                                     | 0%  |    |
| A1 | B  | (1)-02674           | PF00132.19[Hexapep[Bacterial transferase hexapeptide (six repeats)]                                                                                                                                                          | 100%                                                     | 0%  |    |
| A1 | B  | (1)-02675           | PF03466.15[LysR_substrate[LysR substrate binding domain]                                                                                                                                                                     | 100%                                                     | 0%  |    |
| A1 | B  | (1)-02683 (1)-01890 | PF10551.4[MULE[MULE transposase domain];PF00872.13[Transposase_mut[Transposase, Mutator family]                                                                                                                              | 100%                                                     | 0%  |    |

| C23     | A1      | B         | (1)-02696             | PF12730.2 ABC2 membrane_4 ABC-2 family transporter protein]                                                                                                                                                                      |                                                                                                       | 100%                | 7%   |    |
|---------|---------|-----------|-----------------------|----------------------------------------------------------------------------------------------------------------------------------------------------------------------------------------------------------------------------------|-------------------------------------------------------------------------------------------------------|---------------------|------|----|
|         | A1      | B         | (1)-02697             | PF12679.2 ABC2 membrane_2 ABC-2 family transporter protein];PF00005.22 ABC_tran ABC transporter];PF13304.1 AAA_21 AAA domain]                                                                                                    |                                                                                                       | 100%                | 7%   |    |
|         | A1      | B         | (1)-02698             | hypothetical protein                                                                                                                                                                                                             |                                                                                                       | 100%                | 7%   |    |
|         | A1      | B         | (1)-02820             | TIGR01990 bPGM: beta-phosphoglucomutase];PF13419.1 HAD_2 Haloacid dehalogenase-like hydrolase];PF13242.1 Hydrolase_like HAD-hydrolase-like]                                                                                      |                                                                                                       | 100%                | 0%   |    |
|         | A1      | B         | (1)-02821             | PF02595.10 Gly_kinase Glycerate kinase family];TIGR00045 TIGR00045: glycerate kinase]                                                                                                                                            |                                                                                                       | 100%                | 0%   |    |
|         | A1      | B         | (1)-02822             | PF02595.10 Gly_kinase Glycerate kinase family];PF03632.10 Glyco_hydro_65n Glycosyl hydrolase family 65 central catalytic domain]                                                                                                 |                                                                                                       | 100%                | 0%   |    |
|         | A1      | B         | (1)-02823             | PF01408.17 GFO_IDH_MocA Oxidoreductase family, NAD-binding Rossmann fold];PF03636.10 Glyco_hydro_65N Glycosyl hydrolase family 65, N-terminal domain]                                                                            |                                                                                                       | 100%                | 0%   |    |
|         | A1      | B         | (1)-02824             | PF01261.19 AP_endonuc_2 Xylose isomerase-like TIM barrel]                                                                                                                                                                        |                                                                                                       | 100%                | 0%   |    |
|         | A1      | B         | (1)-02825             | PF00107.21 ADH_zinc_N Zinc-binding dehydrogenase]                                                                                                                                                                                |                                                                                                       | 100%                | 0%   |    |
|         | A1      | B         | (1)-02826             | PF00528.17 BPD_transp_1 Binding-protein-dependent transport system inner membrane component]                                                                                                                                     |                                                                                                       | 100%                | 0%   |    |
| C24     | A1      | B         | (1)-02827             | PF00528.17 BPD_transp_1 Binding-protein-dependent transport system inner membrane component]                                                                                                                                     |                                                                                                       | 100%                | 0%   |    |
|         | A1      | B         | (1)-02828             | PF13531.1 SBP_bac_11 Bacterial extracellular solute-binding protein];PF13416.1 SBP_bac_8 Bacterial extracellular solute-binding protein]                                                                                         |                                                                                                       | 100%                | 0%   |    |
|         | A1      | B         | (1)-02829             | PF00128.19 Alpha-amylase Alpha amylase, catalytic domain]                                                                                                                                                                        |                                                                                                       | 100%                | 0%   |    |
|         | A1      | B         | (1)-02830             | PF13377.1 Peripla_BP_3 Periplasmic binding protein-like domain];PF00356.16 LacI Bacterial regulatory proteins, lacI family]                                                                                                      |                                                                                                       | 100%                | 0%   |    |
|         | A1      | B         | (1)-p1001             | PF06970.6 RepA_N Replication initiator protein A (RepA) N-terminus]                                                                                                                                                              |                                                                                                       | 90%                 | 0%   |    |
|         | A1      | B         | (1)-p1049             | PF01797.11 Y1_Trg Transposase IS200 like]                                                                                                                                                                                        |                                                                                                       | 86%                 | 1%   |    |
|         | A1      | B         | (1)-p1049             | PF01385.14 OjB_IS605 Probable transposase];TIGR01766 SpaseT_teng_C: transposase, IS605 OrfB family];PF07282.6 OrfB_Zn_ribbon Putative transposase DNA-binding domain]                                                            |                                                                                                       | 86%                 | 13%  |    |
|         | A1      | B         | (1)-p1050             | PF12910.2 RelB_N Antitoxin of toxin-antitoxin stability system N-terminal];TIGR01552 phd_fam: prevent-host-death family protein];PF02604.14 PndYeFM_antitox Antitoxin Pnd_YeFM, type II toxin-antitoxin system]                  |                                                                                                       | 86%                 | 0%   |    |
|         | A1      | B         | (1)-p1051             | TIGR02116 toxin_Txe_YoeB: addiction module toxin, Txe/YoeB family];PF06769.8 PiPlasmid_Txe Plasmid encoded toxin Txe]                                                                                                            |                                                                                                       | 86%                 | 0%   |    |
|         | A1      | B         | (1)-p1060             | hypothetical protein                                                                                                                                                                                                             |                                                                                                       | 81%                 | 7%   |    |
| C26     | A1      | B         | (1)-p1061             | hypothetical protein                                                                                                                                                                                                             |                                                                                                       | 81%                 | 0%   |    |
|         | A1      | B         | (1)-p1062             | PF06564.7 YhjQ YhjQ protein];PF00142.13 Fer4_NiH 4Fe-4S iron sulfur cluster binding proteins, NiH/frxC family];PF01656.18 CbiA CobQ/CobB/MinD/ParA nucleotide binding domain]                                                    |                                                                                                       | 86%                 | 0%   |    |
|         | A1      | B         | (1)-p1063             | hypothetical protein                                                                                                                                                                                                             |                                                                                                       | 86%                 | 0%   |    |
|         | A1      | B         | (2)-00980             | PF05401.6 NodS Nodulation protein S (NodS)];PF12847.2 Methyltransf_18 Methyltransferase domain];PF00398.15 RnaAD Ribosomal RNA adenine dimethylase]                                                                              |                                                                                                       | 81%                 | 7%   |    |
| C27     | A1      | B         | (2)-01224             | hypothetical protein                                                                                                                                                                                                             |                                                                                                       | 81%                 | 0%   |    |
|         | A1      | B         | (2)-01740             | TIGR00826 EiIB_glc: PTS system, glucose-like IIB component];PF00367.15 PTS_EiIB phosphotransferase system, EiIB]                                                                                                                 |                                                                                                       | 81%                 | 0%   |    |
|         | A1      | B         | (2)-01741             | PF04131.9 NanE Putative N-acetylmannosamine-6-phosphate epimerase]                                                                                                                                                               |                                                                                                       | 81%                 | 7%   |    |
|         | A1      | B         | (2)-01742             | PF01380.17 SIS SIS domain];PF01418.12 HTH_6 Helix-turn-helix domain, rpiR family]                                                                                                                                                |                                                                                                       | 81%                 | 0%   |    |
| Cluster | Group 1 | Group 2   | GeneID in ref. genome | Function or Pfam*                                                                                                                                                                                                                | Fraction of group 1                                                                                   | Fraction of group 2 |      |    |
| C30     | B       | A1        | (3)-00029             | PF00652.17 Ricin_B_lectin Ricin-type beta-trefoil lectin domain];PF00388.14 PI-PLC-X Phosphatidylinositol-specific phospholipase C, X domain]                                                                                    |                                                                                                       | 100%                | 0%   |    |
|         | B       | A1        | (3)-00124             | PF13443.1 HTH_26 Cro/C1-type HTH DNA-binding domain];PF01381.17 HTH_3 Helix-turn-helix];PF12844.2 HTH_19 Helix-turn-helix domain]                                                                                                |                                                                                                       | 100%                | 0%   |    |
|         | B       | A1        | (3)-00125             | PF13396.1 PLDC_N Phospholipase_D-nuclease N-terminal]                                                                                                                                                                            |                                                                                                       | 100%                | 0%   |    |
|         | B       | A1        | (3)-00126             | PF00005.22 ABC_tran ABC transporter];PF13304.1 AAA_21 AAA domain]                                                                                                                                                                |                                                                                                       | 100%                | 0%   |    |
|         | B       | A1        | (3)-00127             | PF12730.2 ABC2 membrane_4 ABC-2 family transporter protein]                                                                                                                                                                      |                                                                                                       | 100%                | 0%   |    |
| C31     | B       | A1        | (3)-00159             | hypothetical protein                                                                                                                                                                                                             |                                                                                                       | 100%                | 0%   |    |
|         | B       | A1        | (3)-00160             | PF05543.8 Penitidease_C47 Staphopain peptidase C47]                                                                                                                                                                              |                                                                                                       | 100%                | 0%   |    |
|         | B       | A1        | (3)-00161             | hypothetical protein                                                                                                                                                                                                             |                                                                                                       | 100%                | 0%   |    |
|         | B       | A1        | (3)-00162             | TIGR01716 RGG_Cterm: transcriptional activator, Rgg/GadR/MutR family, C-terminal domain]                                                                                                                                         |                                                                                                       | 100%                | 0%   |    |
| C32     | B       | A1        | (3)-00257             | hypothetical protein                                                                                                                                                                                                             |                                                                                                       | 100%                | 0%   |    |
|         | B       | A1        | (3)-00258             | hypothetical protein                                                                                                                                                                                                             |                                                                                                       | 100%                | 0%   |    |
|         | B       | A1        | (3)-00259             | hypothetical protein                                                                                                                                                                                                             |                                                                                                       | 100%                | 0%   |    |
| C33     | B       | A1        | (3)-00278             | PF13419.1 HAD_2 Haloacid dehalogenase-like hydrolase];PF13242.1 Hydrolase_like HAD-hydrolase-like]                                                                                                                               |                                                                                                       | 100%                | 0%   |    |
|         | B       | A1        | (3)-00279             | PF00004.24 AAA ATPase family associated with various cellular activities (AAA)];PF01078.16 Mg_chelataase Magnesium chelataase, subunit CH1];PF13401.1 AAA_22 AAA domain];PF00158.21 Sigma54_activat Sigma-54 interaction domain] |                                                                                                       | 100%                | 0%   |    |
|         | B       | A1        | (3)-00282             | PF03609.9 EiII-Sor PTS system sorbose-specific iic component]                                                                                                                                                                    |                                                                                                       | 100%                | 0%   |    |
|         | B       | A1        | (3)-00283             | PF03830.10 PTSiIB_sorb PTS system sorbose subfamily IIB component]                                                                                                                                                               |                                                                                                       | 100%                | 0%   |    |
|         | B       | A1        | (3)-00294             | PF03830.10 PTSiIB_sorb PTS system sorbose subfamily IIB component];PF03610.11 EiIA-man PTS system fructose IIA component]                                                                                                        |                                                                                                       | 100%                | 0%   |    |
| C34     | B       | A1        | (3)-00309             | PF03830.9 ABG_Transport ABG transporter family]                                                                                                                                                                                  |                                                                                                       | 100%                | 0%   |    |
|         | B       | A1        | (3)-00311             | TIGR01887 dipeptidase-like; putative dipeptidase];PF01546.23 Peptidase_M20 Peptidase family M20/M25/M40]                                                                                                                         |                                                                                                       | 100%                | 0%   |    |
|         | B       | A1        | (3)-00373             | PF00589.17 Phage_integrase Phage integrase family]                                                                                                                                                                               |                                                                                                       | 93%                 | 5%   |    |
|         | B       | A1        | (3)-00375             | PF06114.8 DUF955 Domain of unknown function (DUF955)]                                                                                                                                                                            |                                                                                                       | 93%                 | 0%   |    |
| C35     | B       | A1        | (3)-00390             | PF01418.12 HTH_6 Helix-turn-helix domain, rpiR family];PF01380.17 SIS SIS domain]                                                                                                                                                |                                                                                                       | 87%                 | 0%   |    |
|         | B       | A1        | (3)-00391             | PF02056.11 Glyco_hydro_4 Family 4 glycosyl hydrolase]                                                                                                                                                                            |                                                                                                       | 87%                 | 0%   |    |
|         | B       | A1        | (3)-00392             | TIGR02005 PTS-IIB-alpha: PTS system, alpha-glucoside-specific IIBC component];TIGR00826 EiIB_glc: PTS system, glucose-like IIB component]                                                                                        |                                                                                                       | 93%                 | 0%   |    |
|         | B       | A1        | (3)-00431             | PF01656.18 CbiA CobQ/CobB/MinD/ParA nucleotide binding domain];PF09140.6 MipZ ATPase MipZ];TIGR01007 eps_fam: capsular exopolysaccharide family];PF13614.1 AAA_31 AAA domain]                                                    |                                                                                                       | 100%                | 0%   |    |
|         | B       | A1        | (3)-00538             | PF00583.19 Acetyltransf_1 Acetyltransferase (GNAT) family]                                                                                                                                                                       |                                                                                                       | 100%                | 0%   |    |
|         | B       | A1        | (3)-00575             | (3)-02024                                                                                                                                                                                                                        | hypothetical protein                                                                                  |                     | 100% | 0% |
|         | B       | A1        | (3)-00603             | PF10022.4 DUF2264 Uncharacterized protein conserved in bacteria (DUF2264)]                                                                                                                                                       |                                                                                                       | 100%                | 0%   |    |
| C36     | B       | A1        | (3)-00604             | hypothetical protein                                                                                                                                                                                                             |                                                                                                       | 100%                | 0%   |    |
|         | B       | A1        | (3)-00605             | PF01301.14 Glyco_hydro_35 Glycosyl hydrolases family 35];PF02449.10 Glyco_hydro_42 Beta-galactosidase]                                                                                                                           |                                                                                                       | 100%                | 0%   |    |
|         | B       | A1        | (3)-00606             | PF07470.8 Glyco_hydro_88 Glycosyl Hydrolase Family 88]                                                                                                                                                                           |                                                                                                       | 100%                | 0%   |    |
|         | B       | A1        | (3)-00607             | PF00392.16 GntR Bacterial regulatory proteins, gntR family];PF07702.8 UTRA UTRA domain]                                                                                                                                          |                                                                                                       | 100%                | 0%   |    |
|         | B       | A1        | (3)-00610             | PF00874.15 PRD PRD domain];PF05043.8 Mga Mga helix-turn-helix domain];PF00359.17 PTS_EiIA_2 Phosphoenolpyruvate-dependent sugar phosphotransferase system, EIIA 2]                                                               |                                                                                                       | 100%                | 0%   |    |
|         | B       | A1        | (3)-00611             | PF00359.17 PTS_EiIA_2 Phosphoenolpyruvate-dependent sugar phosphotransferase system, EIIA 2]                                                                                                                                     |                                                                                                       | 100%                | 0%   |    |
|         | B       | A1        | (3)-00612             | hypothetical protein                                                                                                                                                                                                             |                                                                                                       | 93%                 | 0%   |    |
|         | B       | A1        | (3)-00613             | TIGR00848 fruA: PTS system, fructose subfamily, IIA component];PF00359.17 PTS_EiIA_2 Phosphoenolpyruvate-dependent sugar phosphotransferase system, EIIA 2]                                                                      |                                                                                                       | 93%                 | 0%   |    |
|         | B       | A1        | (3)-00614             | hypothetical protein                                                                                                                                                                                                             |                                                                                                       | 100%                | 0%   |    |
|         | B       | A1        | (3)-00615             | TIGR01427 PTS_IIC_fructo: PTS system, Fru family, IIC component];PF02738.13 PTS_EiIC Phosphotransferase system, EiIC]                                                                                                            |                                                                                                       | 100%                | 0%   |    |
|         | B       | A1        | (3)-00616             | PF00834.14 RbuU_P_3_epim Ribulose-phosphate 3 epimerase family]                                                                                                                                                                  |                                                                                                       | 100%                | 0%   |    |
|         | B       | A1        | (3)-00617             | PF03830.10 PTSiIB_sorb PTS system sorbose subfamily IIB component];PF03610.11 EiIA-man PTS system fructose IIA component]                                                                                                        |                                                                                                       | 100%                | 0%   |    |
|         | B       | A1        | (3)-00618             | PF03809.9 EiII-Sor PTS system sorbose-specific iic component]                                                                                                                                                                    |                                                                                                       | 100%                | 0%   |    |
| C37     | B       | A1        | (3)-00619             | PF03813.9 EiIID-AGA PTS system mannose/fructose/sorbose family IID component]                                                                                                                                                    |                                                                                                       | 100%                | 0%   |    |
|         | B       | A1        | (3)-00620             | PF08124.6 Lyase_8_N Polysaccharide lyase family 8, N-terminal alpha-helical domain];                                                                                                                                             |                                                                                                       | 100%                | 0%   |    |
|         | B       | A1        | (3)-00850             | PF02839.9 CBM_5_12 Carbohydrate binding domain];PF00041.16 fn3 Fibronectin type III domain];PF00704.23 Glyco_hydro_18 Glycosyl hydrolases family 18]                                                                             |                                                                                                       | 100%                | 0%   |    |
|         | B       | A1        | (3)-00950             | Chitinase C1 / PF02839.9 CBM_5_12 Carbohydrate binding domain];PF00041.16 fn3 Fibronectin type III domain];PF00704.23 Glyco_hydro_18 Glycosyl hydrolases family 18]                                                              |                                                                                                       | 100%                | 0%   |    |
|         | B       | A1        | (3)-00951             | TIGR01716 RGG_Cterm: transcriptional activator, Rgg/GadR/MutR family, C-terminal domain];PF01381.17 HTH_3 Helix-turn-helix];PF12844.2 HTH_19 Helix-turn-helix domain]                                                            |                                                                                                       | 100%                | 0%   |    |
|         | B       | A1        | (3)-00952             | PF03067.10 Chitin_bind_3 Chitin binding domain]                                                                                                                                                                                  |                                                                                                       | 100%                | 0%   |    |
|         | C38     | B         | A1                    | (3)-00961                                                                                                                                                                                                                        | hypothetical protein                                                                                  |                     | 100% | 0% |
|         |         | B         | A1                    | (3)-00962                                                                                                                                                                                                                        | hypothetical protein                                                                                  |                     | 100% | 0% |
|         |         | B         | A1                    | (3)-00959                                                                                                                                                                                                                        | PF02018.12 CBM_4_9 Carbohydrate binding domain]                                                       |                     | 100% | 0% |
|         |         | B         | A1                    | (3)-01091                                                                                                                                                                                                                        | PF12840.2 HTH_20 Helix-turn-helix domain];PF01022.15 HTH_5 Bacterial regulatory protein, arSR family] |                     | 93%  | 0% |
| B       |         | A1        | (3)-01098             | (3)-01097                                                                                                                                                                                                                        | TIGR01167 LPXTG_anchor: LPXTG-motif cell wall anchor domain]                                          |                     | 93%  | 0% |
| B       |         | A1        | (3)-01099             | PF05043.8 Mga Mga helix-turn-helix domain];PF08280.6 HTH_Mga M protein trans-acting positive regulator (MGA) HTH domain]                                                                                                         |                                                                                                       | 93%                 | 0%   |    |
| B       |         | A1        | (3)-01102             | agrC / hypothetical protein                                                                                                                                                                                                      |                                                                                                       | 93%                 | 0%   |    |
| B       |         | A1        | (3)-01103             | agrA / PF04397.10 LyT LyT DNA-binding domain];PF00072.19 Response_reg Response regulator receiver domain]                                                                                                                        |                                                                                                       | 93%                 | 0%   |    |
| B       |         | A1        | (3)-01104             | agrB / PF04647.10 AgrB Accessory gene regulator B]                                                                                                                                                                               |                                                                                                       | 93%                 | 0%   |    |
| B       |         | A1        | (3)-01105             | agrD / cyclic lactone autoinducer peptide                                                                                                                                                                                        |                                                                                                       | 93%                 | 0%   |    |
| C39     | B       | A1        | (3)-01300             | PF03577.10 Peptidase_C69 Peptidase family C69]                                                                                                                                                                                   |                                                                                                       | 100%                | 0%   |    |
|         | B       | A1        | (3)-01359             | hypothetical protein                                                                                                                                                                                                             |                                                                                                       | 93%                 | 19%  |    |
|         | B       | A1        | (3)-01362             | hypothetical protein                                                                                                                                                                                                             |                                                                                                       | 100%                | 19%  |    |
|         | B       | A1        | (3)-01533             | hypothetical protein                                                                                                                                                                                                             |                                                                                                       | 93%                 | 0%   |    |
|         | B       | A1        | (3)-01537             | PF06987.6 TraX TraX protein]                                                                                                                                                                                                     |                                                                                                       | 93%                 | 0%   |    |
|         | B       | A1        | (3)-01538             | PF06983.8 3-dmU-9_3-m 3-demethylubiquinone-9 3-methyltransferase]                                                                                                                                                                |                                                                                                       | 87%                 | 10%  |    |
|         | B       | A1        | (3)-01539             | PF13460.1 NAD_binding_10 NAD(P)-binding];PF04321.12 RmlD_sub_bind RmlD substrate binding domain];PF05368.8 NmA NmA-like family];PF01370.16 E epimerase NAD dependent epimerase/dehydratase family]                               |                                                                                                       | 87%                 | 10%  |    |
|         | B       | A1        | (3)-01540             | PF01965.19 DJ-1_Pfp DJ-1_Pfp family];PF13587.1 DJ-1_Pfp NIN-terminal domain of DJ-1_Pfp family]                                                                                                                                  |                                                                                                       | 87%                 | 10%  |    |
|         | B       | A1        | (3)-01541             | PF12840.2 HTH_20 Helix-turn-helix domain];PF01022.15 HTH_5 Bacterial regulatory protein, arSR family];PF13587.1 DJ-1_Pfp NIN-terminal domain of DJ-1_Pfp family]                                                                 |                                                                                                       | 87%                 | 10%  |    |
|         | B       | A1        | (3)-01545             | hypothetical protein                                                                                                                                                                                                             |                                                                                                       | 87%                 | 10%  |    |
| C40     | B       | A1        | (3)-01605             | PF01717.13 Meth_synt_2 Cobalamin-independent synthase, Catalytic domain]                                                                                                                                                         |                                                                                                       | 93%                 | 0%   |    |
|         | B       | A1        | (3)-01634             | PF12844.2 HTH_19 Helix-turn-helix domain];PF01381.17 HTH_3 Helix-turn-helix]                                                                                                                                                     |                                                                                                       | 100%                | 0%   |    |
|         | B       | A1        | (3)-01635             | hypothetical protein                                                                                                                                                                                                             |                                                                                                       | 100%                | 0%   |    |
| B       | A1      | (3)-01642 | (3)-01641             | PF00005.22 ABC_tran ABC transporter]                                                                                                                                                                                             |                                                                                                       | 100%                | 0%   |    |

|     |         |         |                     |                                                                                                                                                                                                      |                                                                                                                                            |                     |                     |
|-----|---------|---------|---------------------|------------------------------------------------------------------------------------------------------------------------------------------------------------------------------------------------------|--------------------------------------------------------------------------------------------------------------------------------------------|---------------------|---------------------|
| C42 | B       | A1      | (3)-01660           | PF12730.2[ABC2_membrane_4[ABC-2 family transporter protein]                                                                                                                                          | 100%                                                                                                                                       | 0%                  |                     |
|     | B       | A1      | (3)-01661           | PF13304.1[AAA_21[AAA domain]                                                                                                                                                                         | 100%                                                                                                                                       | 0%                  |                     |
| C43 | B       | A1      | (3)-01684           | hypothetical protein                                                                                                                                                                                 | 93%                                                                                                                                        | 0%                  |                     |
|     | B       | A1      | (3)-01695           | hypothetical protein                                                                                                                                                                                 | 87%                                                                                                                                        | 19%                 |                     |
|     | B       | A1      | (3)-01780           | PF04226.8[Transgly_assoc[Transglycosylase associated protein]                                                                                                                                        | 87%                                                                                                                                        | 14%                 |                     |
|     | B       | A1      | (3)-01781           | PF02566.14[OsmC[OsmC-like protein];TIGR03561[organ_hyd_perox:peroxidase, Ohr subfamily]                                                                                                              | 100%                                                                                                                                       | 19%                 |                     |
|     | B       | A1      | (3)-01782           | hypothetical protein                                                                                                                                                                                 | 100%                                                                                                                                       | 19%                 |                     |
|     | B       | A1      | (3)-01783           | PF01420.14[Methylase_S[Type I restriction modification DNA specificity domain]                                                                                                                       | 93%                                                                                                                                        | 19%                 |                     |
|     | B       | A1      | (3)-01784           | PF00480.15[ROK[ROK family]                                                                                                                                                                           | 100%                                                                                                                                       | 5%                  |                     |
|     | B       | A1      | (3)-01785           | PF13377.1[Peripla_BP_3][Periplasmic binding protein-like domain];PF00356.16[LacI][Bacterial regulatory proteins, lacI family];PF01381.17[HTH_3][Helix-turn-helix]                                    | 100%                                                                                                                                       | 0%                  |                     |
|     | B       | A1      | (3)-01786           | TIGR01322[scrB_fam: sucrose-6-phosphate hydrolase];PF08244.7[Glyco_hydro_32C][Glycosyl hydrolases family 32 C terminal]                                                                              | 100%                                                                                                                                       | 0%                  |                     |
|     | B       | A1      | (3)-01787           | TIGR01996[PTS-II-BC_sucr: PTS system, sucrose-specific IIBC component];PF00358.15[PTS_EIIA_1][phosphoenolpyruvate-dependent sugar phosphotransferase system, EIIA 1]                                 | 100%                                                                                                                                       | 0%                  |                     |
| C44 | B       | A1      | (3)-01789           | PF00128.19[Alpha-amylase[Alpha amylase, catalytic domain]                                                                                                                                            | 100%                                                                                                                                       | 0%                  |                     |
|     | B       | A1      | (3)-01805           | PF00874.15[PRD[PRD domain];PF05043.8[Mga[Mga helix-turn-helix domain];PF00359.17[PTS_EIIA_2][Phosphoenolpyruvate-dependent sugar phosphotransferase system, EIIA 2]                                  | 93%                                                                                                                                        | 5%                  |                     |
|     | B       | A1      | (3)-01806           | PF00359.17[PTS_EIIA_2][Phosphoenolpyruvate-dependent sugar phosphotransferase system, EIIA 2]                                                                                                        | 93%                                                                                                                                        | 5%                  |                     |
|     | B       | A1      | (3)-01807           | PF02302.12[PTS_IIB[PTS system, Lactose/Cellobiose specific IIB subunit]                                                                                                                              | 93%                                                                                                                                        | 0%                  |                     |
|     | B       | A1      | (3)-01808           | PF03611.9[IIc-GAT][PTS system sugar-specific permease component]                                                                                                                                     | 93%                                                                                                                                        | 0%                  |                     |
|     | B       | A1      | (3)-01809           | PF13580.1[SIS_2][SIS domain]                                                                                                                                                                         | 93%                                                                                                                                        | 0%                  |                     |
|     | B       | A1      | (3)-01860           | PF02302.12[PTS_IIB[PTS system, Lactose/Cellobiose specific IIB subunit]                                                                                                                              | 93%                                                                                                                                        | 0%                  |                     |
|     | B       | A1      | (3)-01861           | PF01380.17[SIS][SIS domain];PF01418.12[HTH_6][Helix-turn-helix domain, rpiR family]                                                                                                                  | 93%                                                                                                                                        | 0%                  |                     |
|     | B       | A1      | (3)-01862           | TIGR02004[PTS-IIBC-malX: PTS system, maltose and glucose-specific IIBC component];TIGR00826[EIIB_glc: PTS system, glucose-like IIB component]                                                        | 93%                                                                                                                                        | 0%                  |                     |
|     | B       | A1      | (3)-01863           | PF00155.16[Aminotran_1_2][Aminotransferase class I and II]                                                                                                                                           | 100%                                                                                                                                       | 0%                  |                     |
| C45 | B       | A1      | (3)-01865           | PF13671.1[AAA_33[AAA domain];PF06414.7[Zeta_toxin[Zeta toxin]                                                                                                                                        | 100%                                                                                                                                       | 0%                  |                     |
|     | B       | A1      | (3)-01866           | PF00383.17[dCMP_cyt_deam_1][Cytidine and deoxycytidylate deaminase zinc-binding region]                                                                                                              | 100%                                                                                                                                       | 0%                  |                     |
| C46 | B       | A1      | (3)-01908           | hypothetical protein                                                                                                                                                                                 | 93%                                                                                                                                        | 0%                  |                     |
|     | B       | A1      | (3)-01909           | PF09592.4[DUF2233[Predicted periplasmic protein (DUF2233)]                                                                                                                                           | 93%                                                                                                                                        | 0%                  |                     |
| C47 | B       | A1      | (3)-01947           | PF00355.21[Glycosyl_transf_2][Glycosyl transferase family 2];PF04138.9[GrA[GrA-like protein]                                                                                                         | 93%                                                                                                                                        | 0%                  |                     |
|     | B       | A1      | (3)-01944           | PF13527.1[Acetyltransf_9[Acetyltransferase (GNAT) domain];PF00583.19[Acetyltransf_1[Acetyltransferase (GNAT) family]                                                                                 | 100%                                                                                                                                       | 0%                  |                     |
|     | B       | A1      | (3)-01947           | hypothetical protein                                                                                                                                                                                 | 100%                                                                                                                                       | 0%                  |                     |
|     | B       | A1      | (3)-02009           | hypothetical protein                                                                                                                                                                                 | 93%                                                                                                                                        | 0%                  |                     |
|     | B       | A1      | (3)-02010           | PF11187.3[DUF2974[Protein of unknown function (DUF2974)]                                                                                                                                             | 100%                                                                                                                                       | 0%                  |                     |
| C48 | B       | A1      | (3)-02012           | hypothetical protein                                                                                                                                                                                 | 100%                                                                                                                                       | 0%                  |                     |
|     | B       | A1      | (3)-02023           | hypothetical protein                                                                                                                                                                                 | 100%                                                                                                                                       | 0%                  |                     |
|     | B       | A1      | (3)-02056           | PF00496.17[SBP_bac_5][Bacterial extracellular solute-binding proteins, family 5 Middle]                                                                                                              | 100%                                                                                                                                       | 0%                  |                     |
|     | B       | A1      | (3)-02057           | PF00528.17[BPD_transp_1][Binding-protein-dependent transport system inner membrane component]                                                                                                        | 100%                                                                                                                                       | 0%                  |                     |
|     | B       | A1      | (3)-02058           | PF00528.17[BPD_transp_1][Binding-protein-dependent transport system inner membrane component];PF12911.2[OppC_N][N-terminal TM domain of oligopeptide transport permease C]                           | 100%                                                                                                                                       | 0%                  |                     |
| C49 | B       | A1      | (3)-02059           | PF00005.22[ABC_tran[ABC transporter];TIGR01727[oligo_HPY: oligopeptide/dipeptide ABC transporter, ATP-binding protein, C-terminal domain]                                                            | 100%                                                                                                                                       | 0%                  |                     |
|     | B       | A1      | (3)-02060           | PF00005.22[ABC_tran[ABC transporter];PF05352.7[oligo_HPY: oligopeptide/dipeptide transporter, C-terminal region]                                                                                     | 100%                                                                                                                                       | 0%                  |                     |
|     | B       | A1      | (3)-02061           | PF01230.18[HTH[HTH domain];PF11969.3[DcpS_C[Scavenger mRNA decapping enzyme C-term binding]                                                                                                          | 100%                                                                                                                                       | 0%                  |                     |
|     | B       | A1      | (3)-02065           | PF00293.23[NUDX][NUDX domain]                                                                                                                                                                        | 93%                                                                                                                                        | 0%                  |                     |
|     | B       | A1      | (3)-02066           | hypothetical protein                                                                                                                                                                                 | 93%                                                                                                                                        | 0%                  |                     |
| C50 | B       | A1      | (3)-02085           | PF00226.26[DnaJ][DnaJ domain]                                                                                                                                                                        | 100%                                                                                                                                       | 0%                  |                     |
|     | B       | A1      | (3)-02086           | PF00753.22[Lactamase_B][Metallo-beta-lactamase superfamily];PF12706.2[Lactamase_B_2][Beta-lactamase superfamily domain]                                                                              | 100%                                                                                                                                       | 0%                  |                     |
| C51 | B       | A1      | (3)-02260           | hypothetical protein                                                                                                                                                                                 | 100%                                                                                                                                       | 0%                  |                     |
|     | B       | A1      | (3)-02302           | hypothetical protein                                                                                                                                                                                 | 87%                                                                                                                                        | 0%                  |                     |
|     | B       | A1      | (3)-02464           | PF05043.8[Mga[Mga helix-turn-helix domain]                                                                                                                                                           | 100%                                                                                                                                       | 0%                  |                     |
|     | B       | A1      | (3)-02465           | PF05043.8[Mga[Mga helix-turn-helix domain]                                                                                                                                                           | 100%                                                                                                                                       | 0%                  |                     |
|     | B       | A1      | (3)-02474           | hypothetical protein                                                                                                                                                                                 | 100%                                                                                                                                       | 0%                  |                     |
| C52 | B       | A1      | (3)-02475           | hypothetical protein                                                                                                                                                                                 | 87%                                                                                                                                        | 0%                  |                     |
|     | B       | A1      | (3)-02477           | hypothetical protein                                                                                                                                                                                 | 100%                                                                                                                                       | 0%                  |                     |
|     | B       | A1      | (3)-02478           | hypothetical protein                                                                                                                                                                                 | 93%                                                                                                                                        | 0%                  |                     |
|     | B       | A1      | (3)-02509           | hypothetical protein                                                                                                                                                                                 | 93%                                                                                                                                        | 0%                  |                     |
|     | B       | A1      | (3)-02510           | PF06013.7[WXG100[Proteins of 100 residues with WXG];TIGR03930[WXG100_ESAT6: WXG100 family type VII secretion target];PF10824.3[DUF2580[Protein of unknown function (DUF2580)]                        | 87%                                                                                                                                        | 0%                  |                     |
| C53 | B       | A1      | (3)-02511           | TIGR03929[T7_esaA_Nterm: type VII secretion protein EsaA]                                                                                                                                            | 87%                                                                                                                                        | 0%                  |                     |
|     | B       | A1      | (3)-02512           | hypothetical protein                                                                                                                                                                                 | 87%                                                                                                                                        | 0%                  |                     |
|     | B       | A1      | (3)-02513           | PF08817.5[YukD][WXG100 protein secretion system (Wss), protein YukD]                                                                                                                                 | 87%                                                                                                                                        | 0%                  |                     |
|     | B       | A1      | (3)-02515 (3)-02514 | TIGR03926[T7_EssB: type VII secretion protein EssB];PF10140.4[YukC][WXG100 protein secretion system (Wss), protein YukC]                                                                             | 87%                                                                                                                                        | 0%                  |                     |
|     | B       | A1      | (3)-02516 (3)-02517 | PF01580.13[FtsK_SpoIIIE][FtsK/SpoIIIE family];PF12846.2[AAA_10][AAA-like domain];TIGR03928[T7_EssCb: Firm: type VII secretion protein EssC]                                                          | 87%                                                                                                                                        | 0%                  |                     |
|     | B       | A1      | (3)-02525           | PF01832.15[GaJA[Galactosaminidase[Mannosyl-glycoprotein endo-beta-N-acetylglucosaminidase];PF07538.6][Chv1][Clostridial hydrophobic W]                                                               | 100%                                                                                                                                       | 0%                  |                     |
|     | B       | A1      | (3)-02550           | PF04896.7[VanZ][VanZ-like family]                                                                                                                                                                    | 93%                                                                                                                                        | 0%                  |                     |
|     | B       | A1      | (3)-02576           | PF00094.24[AAAT][Pase family associated with various cellular activities (AAA)];PF00158.21[Sigma54_activat][Sigma-54 interaction domain];PF07724.9[AAA_2][AAA domain (Cdc48 subfamily)]              | 93%                                                                                                                                        | 0%                  |                     |
|     | B       | A1      | (3)-02636           | PF03009.12[GDPD][Glycerophosphoryl diester phosphodiesterase family]                                                                                                                                 | 93%                                                                                                                                        | 0%                  |                     |
|     | B       | A1      | (3)-02648           | PF02525.12[Flavodoxin_2][Flavodoxin-like fold];PF03358.10[FMN_red][NADPH-dependent FMN reductase]                                                                                                    | 93%                                                                                                                                        | 0%                  |                     |
| C54 | B       | A1      | (3)-02650           | hypothetical protein                                                                                                                                                                                 | 93%                                                                                                                                        | 0%                  |                     |
|     | B       | A1      | (3)-02668           | PF01548.12[DEDD_Tnp_IS110][Transposase];PF02371.11[Transposase_20][Transposase IS116/IS110/S902 family]                                                                                              | 93%                                                                                                                                        | 5%                  |                     |
|     | B       | A1      | (3)-02841           | hypothetical protein                                                                                                                                                                                 | 100%                                                                                                                                       | 0%                  |                     |
|     | B       | A1      | (3)-02866           | TIGR00410[lacE: PTS system, lactose/cellobiose family IIC component];PF02378.13[PTS_EIIC][Phosphotransferase system, EIIC]                                                                           | 100%                                                                                                                                       | 0%                  |                     |
|     | B       | A1      | (3)-02871           | PF05043.8[Mga[Mga helix-turn-helix domain];PF08280.6[HTH_Mga][Mga protein trans-acting positive regulator (MGA) HTH domain]                                                                          | 100%                                                                                                                                       | 0%                  |                     |
|     | B       | A1      | (3)-02872           | hypothetical protein                                                                                                                                                                                 | 100%                                                                                                                                       | 0%                  |                     |
|     | B       | A1      | (3)-02873           | hypothetical protein                                                                                                                                                                                 | 100%                                                                                                                                       | 0%                  |                     |
|     | B       | A1      | (3)-02874           | hypothetical protein                                                                                                                                                                                 | 100%                                                                                                                                       | 0%                  |                     |
|     | B       | A1      | (3)-02875           | hypothetical protein                                                                                                                                                                                 | 100%                                                                                                                                       | 0%                  |                     |
|     | B       | A1      | (3)-02876           | PF11797.3[DUF3324[Protein of unknown function C-terminal (DUF3324)];PF06030.7[DUF916[Bacterial protein of unknown function (DUF916)]                                                                 | 100%                                                                                                                                       | 0%                  |                     |
| C22 | B       | A1      | (3)-02878           | hypothetical protein                                                                                                                                                                                 | 87%                                                                                                                                        | 0%                  |                     |
|     | B       | A1      | (3)-02890           | hypothetical protein                                                                                                                                                                                 | 100%                                                                                                                                       | 0%                  |                     |
|     | B       | A1      | (4)-01523           | PF00874.15[PRD[PRD domain]                                                                                                                                                                           | 87%                                                                                                                                        | 5%                  |                     |
|     | B       | A1      | (4)-02162           | PF00085.15[Thioredoxin][Thioredoxin]                                                                                                                                                                 | 87%                                                                                                                                        | 0%                  |                     |
|     | B       | A1      | (4)-04231           | hypothetical protein                                                                                                                                                                                 | 87%                                                                                                                                        | 0%                  |                     |
|     | Cluster | Group 1 | Group 2             | GeneID in ref. genome                                                                                                                                                                                | Function or Pfam <sup>a</sup>                                                                                                              | Fraction of group 1 | Fraction of group 2 |
|     | C24     | A2      | B                   | (1)-02830                                                                                                                                                                                            | PF13377.1[Peripla_BP_3][Periplasmic binding protein-like domain];PF00356.16[LacI][Bacterial regulatory proteins, lacI family]              | 100%                | 0%                  |
|     |         | A2      | B                   | (1)-02829                                                                                                                                                                                            | PF00128.19[Alpha-amylase[Alpha amylase, catalytic domain]                                                                                  | 100%                | 0%                  |
|     |         | A2      | B                   | (1)-02828                                                                                                                                                                                            | PF13531.1[SBP_bac_11][Bacterial extracellular solute-binding protein];PF13416.1[SBP_bac_8][Bacterial extracellular solute-binding protein] | 100%                | 0%                  |
|     |         | A2      | B                   | (1)-02306 (1)-02305                                                                                                                                                                                  | PF00583.19[Acetyltransf_1[Acetyltransferase (GNAT) family]                                                                                 | 100%                | 0%                  |
| A2  |         | B       | (1)-02295           | PF02517.11[Abi][CAAX protease self-immunity]                                                                                                                                                         | 86%                                                                                                                                        | 0%                  |                     |
| C8  | A2      | B       | (1)-01075           | hypothetical protein                                                                                                                                                                                 | 100%                                                                                                                                       | 0%                  |                     |
|     | A2      | B       | (1)-01076           | hypothetical protein                                                                                                                                                                                 | 100%                                                                                                                                       | 0%                  |                     |
| C13 | A2      | B       | (1)-01677           | hypothetical protein                                                                                                                                                                                 | 100%                                                                                                                                       | 0%                  |                     |
|     | A2      | B       | (1)-01684           | hypothetical protein                                                                                                                                                                                 | 97%                                                                                                                                        | 0%                  |                     |
| C24 | A2      | B       | (1)-02820           | TIGR01990[bPGM: beta-phosphoglucomutase];PF13419.1[HAD_2][Haloacid dehalogenase-like hydrolase];PF13242.1[Hydrolase_like][HAD-hydrolase-like]                                                        | 100%                                                                                                                                       | 0%                  |                     |
|     | A2      | B       | (1)-02821           | PF02595.10[Gly_kinase][Glycerate kinase family];TIGR00045[Glycerate kinase]                                                                                                                          | 100%                                                                                                                                       | 0%                  |                     |
|     | A2      | B       | (1)-02822           | PF02595.10[Gly_kinase][Glycerate kinase family];PF03632.10[Glyco_hydro_65m][Glycosyl hydrolase family 65 central catalytic domain]                                                                   | 100%                                                                                                                                       | 0%                  |                     |
|     | A2      | B       | (1)-02824           | PF01408.17[ICF_IDH_MoxA][Oxidoreductase family, NAD-binding Rossmann fold];PF03636.10[Glyco_hydro_65N][Glycosyl hydrolase family 65, N-terminal domain]                                              | 100%                                                                                                                                       | 0%                  |                     |
|     | A2      | B       | (1)-02824           | PF01261.19[ATP_endonuc_2][Xylose isomerase-like TIM barre]                                                                                                                                           | 100%                                                                                                                                       | 0%                  |                     |
|     | A2      | B       | (1)-02825           | PF00107.21[ADH_zinc_N][Zinc-binding dehydrogenase]                                                                                                                                                   | 100%                                                                                                                                       | 0%                  |                     |
|     | A2      | B       | (1)-02826           | PF00528.17[BPD_transp_1][Binding-protein-dependent transport system inner membrane component]                                                                                                        | 100%                                                                                                                                       | 0%                  |                     |
|     | A2      | B       | (1)-02827           | PF00528.17[BPD_transp_1][Binding-protein-dependent transport system inner membrane component]                                                                                                        | 100%                                                                                                                                       | 0%                  |                     |
|     | A2      | B       | (1)-02675           | PF03466.15[LysR_substrate][LysR substrate binding domain]                                                                                                                                            | 97%                                                                                                                                        | 0%                  |                     |
|     | A2      | B       | (1)-02674           | PF00132.19[Hexapep][Bacterial transferase hexapeptide (six repeats)]                                                                                                                                 | 97%                                                                                                                                        | 0%                  |                     |
| C22 | A2      | B       | (1)-02673           | PF13460.1[NAD_binding_10][NADH(P)-binding];PF08659.5[KR1][KR domain];PF08643.5[DUF1776][Fungal family of unknown function (DUF1776)];PF13561.1[adh_short_C2][Enoyl-(Acyl carrier protein) reductase] | 97%                                                                                                                                        | 0%                  |                     |
|     | A2      | B       | (1)-00229           | hypothetical protein                                                                                                                                                                                 | 84%                                                                                                                                        | 0%                  |                     |

|     |         |         |                     |                                                                                                                                                                                                                               |                                                                                                                                               |                     |                     |    |
|-----|---------|---------|---------------------|-------------------------------------------------------------------------------------------------------------------------------------------------------------------------------------------------------------------------------|-----------------------------------------------------------------------------------------------------------------------------------------------|---------------------|---------------------|----|
| C2  | A2      | B       | (1)-00228           | hypothetical protein                                                                                                                                                                                                          |                                                                                                                                               | 95%                 | 7%                  |    |
|     | A2      | B       | (1)-00227           | PF06769.8 Plasmid_Txe Plasmid encoded toxin Txe].PF05016.9 Plasmid_stabil Plasmid stabilisation system protein]                                                                                                               |                                                                                                                                               | 95%                 | 7%                  |    |
| C10 | A2      | B       | (1)-00226           | PF12910.2 RelB_N Antitoxin of toxin-antitoxin stability system N-terminal]                                                                                                                                                    |                                                                                                                                               | 95%                 | 7%                  |    |
|     | A2      | B       | (1)-00329           | PF13527.1 Acetyltransf_9 Acetyltransferase (GNAT) domain]                                                                                                                                                                     |                                                                                                                                               | 89%                 | 0%                  |    |
|     | A2      | B       | (1)-01283           | BaG family transcriptional antiterminal / PF00874.15 PRD PRD domain]                                                                                                                                                          |                                                                                                                                               | 100%                | 0%                  |    |
|     | A2      | B       | (1)-01281           | PTS system, N-acetylglucosamine-specific [IIBC component / PF02378.13 PTS_EIIC Phosphotransferase system, EIIC                                                                                                                |                                                                                                                                               | 100%                | 0%                  |    |
|     | A2      | B       | (1)-01280           | glycosyl hydrolase family protein / PF02056.11 Glyco_hydro_4 Family 4 glycosyl hydrolase]                                                                                                                                     |                                                                                                                                               | 100%                | 0%                  |    |
|     | A2      | B       | (1)-01279           | PTS system, IICBA component / PF00358.15 PTS_EIIA_1 phosphoenolpyruvate-dependent sugar phosphotransferase system, EIIA 1 TIGR00830 PTBA: PTS system, glucose subfamily, IIA component]                                       |                                                                                                                                               | 100%                | 0%                  |    |
|     | A2      | B       | (1)-02508           | hypothetical protein                                                                                                                                                                                                          |                                                                                                                                               | 100%                | 0%                  |    |
|     | A2      | B       | (1)-02509           | PF00005.22 ABC_tran ABC transporter].PF13304.1 AAA_21 AAA domain].PF12848.2 ABC_tran_2 ABC transporter]                                                                                                                       |                                                                                                                                               | 100%                | 0%                  |    |
|     | A2      | B       | (1)-02468           | hypothetical protein                                                                                                                                                                                                          |                                                                                                                                               | 100%                | 0%                  |    |
|     | A2      | B       | (1)-02467           | PF00196.14 GerE Bacterial regulatory proteins, luxR family].PF00072.19 Response_reg Response regulator receiver domain]                                                                                                       |                                                                                                                                               | 100%                | 0%                  |    |
| C19 | A2      | B       | (1)-02466           | PF07730.8 HiskA_3 Histidine kinase].PF02518.21 HATPase_c Histidine kinase-, DNA gyrase B-, and HSP90-like ATPase]                                                                                                             |                                                                                                                                               | 100%                | 0%                  |    |
|     | A2      | B       | (1)-02465           | PF00005.22 ABC_tran ABC transporter].PF13304.1 AAA_21 AAA domain]                                                                                                                                                             |                                                                                                                                               | 100%                | 0%                  |    |
|     | A2      | B       | (1)-02464           | PF12698.2 ABC2_membrane_3 ABC-2 family transporter protein]                                                                                                                                                                   |                                                                                                                                               | 100%                | 0%                  |    |
|     | A2      | B       | (1)-02463           | PF01281.19 ABC2_membrane ABC-2 type transporter].PF12698.2 ABC2_membrane_3 ABC-2 family transporter protein]                                                                                                                  |                                                                                                                                               | 100%                | 0%                  |    |
|     | A2      | B       | (1)-01786 (1)-01763 | PF02275.13 CBAA Linear amide C-N hydrolases, cholestyglycine hydrolase family]                                                                                                                                                |                                                                                                                                               | 95%                 | 0%                  |    |
|     | A2      | B       | (1)-02582           | PF02012.15 BNR BNR/Asp-box repeat]                                                                                                                                                                                            |                                                                                                                                               | 92%                 | 0%                  |    |
|     | A2      | B       | (1)-01276           | hypothetical protein                                                                                                                                                                                                          |                                                                                                                                               | 92%                 | 0%                  |    |
|     | A2      | B       | (1)-02696           | PF12730.2 ABC2_membrane_4 ABC-2 family transporter protein]                                                                                                                                                                   |                                                                                                                                               | 97%                 | 7%                  |    |
|     | A2      | B       | (1)-02697           | PF12679.2 ABC2_membrane_2 ABC-2 family transporter protein].PF00005.22 ABC_tran ABC transporter].PF13304.1 AAA_21 AAA domain]                                                                                                 |                                                                                                                                               | 100%                | 7%                  |    |
|     | A2      | B       | (1)-02698           | hypothetical protein                                                                                                                                                                                                          |                                                                                                                                               | 92%                 | 7%                  |    |
| C23 | A2      | B       | (1)-00998           | hypothetical protein                                                                                                                                                                                                          |                                                                                                                                               | 92%                 | 0%                  |    |
|     | A2      | B       | (1)-01143 (1)-01144 | hypothetical protein                                                                                                                                                                                                          |                                                                                                                                               | 81%                 | 0%                  |    |
|     | A2      | B       | (1)-02577           | PF05738.8 Cna_B Cna protein B-type domain].TIGR01167 LPXTG_anchor: LPXTG-motif cell wall anchor domain]                                                                                                                       |                                                                                                                                               | 97%                 | 0%                  |    |
|     | A2      | B       | (1)-01798           | hypothetical protein                                                                                                                                                                                                          |                                                                                                                                               | 86%                 | 0%                  |    |
|     | A2      | B       | (1)-01282           | PF04794.7 YjvC YjvC-like protein]                                                                                                                                                                                             |                                                                                                                                               | 100%                | 0%                  |    |
|     | A2      | B       | (1)-02231           | PF00149.23 Metallophos Calcineurin-like phosphoesterase]                                                                                                                                                                      |                                                                                                                                               | 84%                 | 0%                  |    |
|     | A2      | B       | (1)-00149           | hypothetical protein                                                                                                                                                                                                          |                                                                                                                                               | 92%                 | 0%                  |    |
|     | Cluster | Group 1 | Group 2             | GeneID in ref. genome                                                                                                                                                                                                         | Function or Pfam*                                                                                                                             | Fraction of group 1 | Fraction of group 2 |    |
|     | C30     | B       | A2                  | (3)-00029                                                                                                                                                                                                                     | PF00652.17 Ricin_B_lectin Ricin-type beta-trefoil lectin domain].PF00388.14 PI-PLC_X Phosphatidylinositol-specific phospholipase C, X domain] |                     | 100%                | 0% |
|     |         | B       | A2                  | (3)-00124                                                                                                                                                                                                                     | PF13443.1 HTH_26 Cro/C1-type HTH DNA-binding domain].PF01381.17 HTH_3 Helix-turn-helix].PF12844.2 HTH_19 Helix-turn-helix domain]             |                     | 100%                | 5% |
| B   |         | A2      | (3)-00125           | PF13396.1 PLDc_N Phospholipase_D-nuclease N-terminal]                                                                                                                                                                         |                                                                                                                                               | 100%                | 5%                  |    |
| B   |         | A2      | (3)-00126           | PF00005.22 ABC_tran ABC transporter].PF13304.1 AAA_21 AAA domain]                                                                                                                                                             |                                                                                                                                               | 100%                | 8%                  |    |
| B   |         | A2      | (3)-00127           | PF12730.2 ABC2_membrane_4 ABC-2 family transporter protein]                                                                                                                                                                   |                                                                                                                                               | 100%                | 5%                  |    |
| B   |         | A2      | (3)-00159           | hypothetical protein                                                                                                                                                                                                          |                                                                                                                                               | 100%                | 0%                  |    |
| B   |         | A2      | (3)-00160           | PF05543.8 Peptidase_C47 Staphopain peptidase C47]                                                                                                                                                                             |                                                                                                                                               | 100%                | 0%                  |    |
| B   |         | A2      | (3)-00161           | hypothetical protein                                                                                                                                                                                                          |                                                                                                                                               | 100%                | 0%                  |    |
| B   |         | A2      | (3)-00162           | TIGR01716 RGG_Cterm: transcriptional activator, Rgg/GadR/MutR family, C-terminal domain]                                                                                                                                      |                                                                                                                                               | 100%                | 0%                  |    |
| B   |         | A2      | (3)-00257           | hypothetical protein                                                                                                                                                                                                          |                                                                                                                                               | 100%                | 5%                  |    |
| C32 | B       | A2      | (3)-00258           | hypothetical protein                                                                                                                                                                                                          |                                                                                                                                               | 100%                | 5%                  |    |
|     | B       | A2      | (3)-00259           | hypothetical protein                                                                                                                                                                                                          |                                                                                                                                               | 100%                | 5%                  |    |
|     | B       | A2      | (3)-00278           | PF13419.1 HAD_2 Haloacid dehalogenase-like hydrolase].PF13242.1 Hydrolase_like HAD-hydrolyase-like]                                                                                                                           |                                                                                                                                               | 100%                | 14%                 |    |
|     | B       | A2      | (3)-00279           | PF00004.24 AAA ATPase family associated with various cellular activities (AAA).PF01078.16 Mg_chelatase Magnesium chelatase, subunit ChI].PF13401.1 AAA_22 AAA domain].PF00158.21 Sigma54_activat Sigma-54 interaction domain] |                                                                                                                                               | 100%                | 14%                 |    |
|     | B       | A2      | (3)-00282           | PF03609.9 EII-Sor PTS system sorbose-specific ic component]                                                                                                                                                                   |                                                                                                                                               | 100%                | 14%                 |    |
|     | B       | A2      | (3)-00283           | PF03630.10 PTS IB sorb PTS system sorbose subfamily IIB component]                                                                                                                                                            |                                                                                                                                               | 100%                | 14%                 |    |
|     | B       | A2      | (3)-00284           | PF03630.10 PTS IB sorb PTS system sorbose subfamily IIB component].PF03610.11 EIIA-man PTS system fructose IIA component]                                                                                                     |                                                                                                                                               | 100%                | 14%                 |    |
|     | B       | A2      | (3)-00310 (3)-00309 | PF03806.8 ABC_tran Aba1 putative transporter family]                                                                                                                                                                          |                                                                                                                                               | 100%                | 5%                  |    |
|     | B       | A2      | (3)-00311 (3)-00312 | TIGR01887 dipeptidase-like: putative dipeptidase].PF01546.23 Peptidase_M20 Peptidase family M20/M25/M40]                                                                                                                      |                                                                                                                                               | 100%                | 5%                  |    |
|     | B       | A2      | (3)-00373 (3)-00372 | PF00589.17 Phage_integrase Phage integrase family]                                                                                                                                                                            |                                                                                                                                               | 93%                 | 5%                  |    |
| C35 | B       | A2      | (3)-00390           | PF01418.12 HTH_6 Helix-turn-helix domain, rpiR family].PF01380.17 SIS SIS domain]                                                                                                                                             |                                                                                                                                               | 87%                 | 0%                  |    |
|     | B       | A2      | (3)-00391           | PF02056.11 Glyco_hydro_4 Family 4 glycosyl hydrolase]                                                                                                                                                                         |                                                                                                                                               | 87%                 | 0%                  |    |
|     | B       | A2      | (3)-00392           | TIGR02005 PTS-IIBC-alpha: PTS system, alpha-glucoside-specific IIBC component].TIGR00826 EIIb_glc: PTS system, glucose-like IIB component]                                                                                    |                                                                                                                                               | 93%                 | 0%                  |    |
|     | B       | A2      | (3)-00431           | PF01656.18 CobA CobB/CobD/ParA nucleotide binding domain].PF09140.6 MipZ ATPase MipZ].TIGR01007 eps_fam: capsular exopolysaccharide family].PF13614.1 AAA_31 AAA domain]                                                      |                                                                                                                                               | 100%                | 5%                  |    |
|     | B       | A2      | (3)-00538           | PF00583.19 Acetyltransf_1 Acetyltransferase (GNAT) family]                                                                                                                                                                    |                                                                                                                                               | 100%                | 3%                  |    |
|     | B       | A2      | (3)-00575 (3)-02024 | hypothetical protein                                                                                                                                                                                                          |                                                                                                                                               | 100%                | 5%                  |    |
|     | B       | A2      | (3)-00603           | PF10022.4 DUF2264 Uncharacterized protein conserved in bacteria (DUF2264)]                                                                                                                                                    |                                                                                                                                               | 100%                | 0%                  |    |
|     | B       | A2      | (3)-00604           | hypothetical protein                                                                                                                                                                                                          |                                                                                                                                               | 100%                | 0%                  |    |
|     | B       | A2      | (3)-00605           | PF01301.14 Glyco_hydro_35 Glycosyl hydrolases family 35].PF02449.10 Glyco_hydro_42 Beta-galactosidase]                                                                                                                        |                                                                                                                                               | 100%                | 0%                  |    |
|     | B       | A2      | (3)-00606           | PF07470.8 Glyco_hydro_88 Glycosyl Hydrolase Family 88]                                                                                                                                                                        |                                                                                                                                               | 100%                | 0%                  |    |
| C36 | B       | A2      | (3)-00607           | PF00392.16 GntR Bacterial regulatory proteins, gntR family].PF07702.8 UTRA UTRA domain]                                                                                                                                       |                                                                                                                                               | 100%                | 0%                  |    |
|     | B       | A2      | (3)-00610           | PF00874.15 PRD PRD domain].PF05043.8 Mga Mga helix-turn-helix domain].PF00359.17 PTS_EIIA_2 Phosphoenolpyruvate-dependent sugar phosphotransferase system, EIIA 2]                                                            |                                                                                                                                               | 100%                | 0%                  |    |
|     | B       | A2      | (3)-00611           | PF00359.17 PTS_EIIA_2 Phosphoenolpyruvate-dependent sugar phosphotransferase system, EIIA 2]                                                                                                                                  |                                                                                                                                               | 100%                | 0%                  |    |
|     | B       | A2      | (3)-00612           | hypothetical protein                                                                                                                                                                                                          |                                                                                                                                               | 93%                 | 0%                  |    |
|     | B       | A2      | (3)-00613           | TIGR00848 fruA: PTS system, fructose subfamily, IIA component].PF00359.17 PTS_EIIA_2 Phosphoenolpyruvate-dependent sugar phosphotransferase system, EIIA 2]                                                                   |                                                                                                                                               | 93%                 | 0%                  |    |
|     | B       | A2      | (3)-00614           | hypothetical protein                                                                                                                                                                                                          |                                                                                                                                               | 100%                | 0%                  |    |
|     | B       | A2      | (3)-00615           | TIGR01427 PTS_IIC_fructo: PTS system, Fru family, IIC component].PF02378.13 PTS_EIIC Phosphotransferase system, EIIC]                                                                                                         |                                                                                                                                               | 100%                | 0%                  |    |
|     | B       | A2      | (3)-00616           | PF00834.14 RbuL_P_3_epim Ribulose-phosphate 3 epimerase family]                                                                                                                                                               |                                                                                                                                               | 100%                | 0%                  |    |
|     | B       | A2      | (3)-00617           | PF03630.10 PTS IB sorb PTS system sorbose subfamily IIB component].PF03610.11 EIIA-man PTS system fructose IIA component]                                                                                                     |                                                                                                                                               | 100%                | 0%                  |    |
|     | B       | A2      | (3)-00618           | PF03609.9 EII-Sor PTS system sorbose-specific ic component]                                                                                                                                                                   |                                                                                                                                               | 100%                | 0%                  |    |
| C37 | B       | A2      | (3)-00619           | PF03613.9 EIID-AGA PTS system mannose/fructose/sorbose family IID component]                                                                                                                                                  |                                                                                                                                               | 100%                | 0%                  |    |
|     | B       | A2      | (3)-00620 (3)-00621 | PF08124.6 Lyase_8_N Polysaccharide lyase family 8, N terminal alpha-helical domain].PF00041.16 fn3 Fibronectin type III domain].PF00704.23 Glyco_hydro_18 Glycosyl hydrolases family 18]                                      |                                                                                                                                               | 100%                | 0%                  |    |
|     | B       | A2      | (3)-00850           | PF02839.9 CBM_5_12 Carbohydrate binding domain].PF00041.16 fn3 Fibronectin type III domain].PF00704.23 Glyco_hydro_18 Glycosyl hydrolases family 18]                                                                          |                                                                                                                                               | 100%                | 11%                 |    |
|     | B       | A2      | (3)-00950           | Chitinase C1 / PF02839.9 CBM_5_12 Carbohydrate binding domain].PF00041.16 fn3 Fibronectin type III domain].PF00704.23 Glyco_hydro_18 Glycosyl hydrolases family 18]                                                           |                                                                                                                                               | 100%                | 0%                  |    |
|     | B       | A2      | (3)-00951           | TIGR01716 RGG_Cterm: transcriptional activator, Rgg/GadR/MutR family, C-terminal domain].PF01381.17 HTH_3 Helix-turn-helix].PF12844.2 HTH_19 Helix-turn-helix domain]                                                         |                                                                                                                                               | 100%                | 0%                  |    |
|     | B       | A2      | (3)-00952           | PF03067.10 Chitin_bind_3 Chitin binding domain]                                                                                                                                                                               |                                                                                                                                               | 100%                | 0%                  |    |
|     | B       | A2      | (3)-00961           | hypothetical protein                                                                                                                                                                                                          |                                                                                                                                               | 100%                | 0%                  |    |
|     | B       | A2      | (3)-00962           | hypothetical protein                                                                                                                                                                                                          |                                                                                                                                               | 100%                | 0%                  |    |
|     | B       | A2      | (3)-00999           | PF02018.12 CBM_4_9 Carbohydrate binding domain]                                                                                                                                                                               |                                                                                                                                               | 100%                | 11%                 |    |
|     | B       | A2      | (3)-01041           | PF12844.2 HTH_20 Helix-turn-helix domain].PF1022.15 HTH_5 Bacterial regulatory protein, arsR family]                                                                                                                          |                                                                                                                                               | 93%                 | 3%                  |    |
| C39 | B       | A2      | (3)-01098 (3)-01097 | TIGR01167 LPXTG_anchor: LPXTG-motif cell wall anchor domain]                                                                                                                                                                  |                                                                                                                                               | 93%                 | 3%                  |    |
|     | B       | A2      | (3)-01099           | PF05043.8 Mga Mga helix-turn-helix domain].PF08280.6 HTH_Mga M protein trans-acting positive regulator (MGA) HTH domain]                                                                                                      |                                                                                                                                               | 93%                 | 3%                  |    |
|     | B       | A2      | (3)-01102           | agrC / hypothetical protein                                                                                                                                                                                                   |                                                                                                                                               | 93%                 | 3%                  |    |
|     | B       | A2      | (3)-01103           | agrA / PF04397.10 LyT LyT DNA-binding domain].PF00072.19 Response_reg Response regulator receiver domain]                                                                                                                     |                                                                                                                                               | 93%                 | 3%                  |    |
|     | B       | A2      | (3)-01104           | agrB / PF04647.10 AgrB Accessory gene regulator B]                                                                                                                                                                            |                                                                                                                                               | 93%                 | 3%                  |    |
|     | B       | A2      | (3)-01105           | agrD / cyclic lactone autoinducer peptide                                                                                                                                                                                     |                                                                                                                                               | 93%                 | 3%                  |    |
|     | B       | A2      | (3)-01300           | PF03577.10 Peptidase_C69 Peptidase family C69]                                                                                                                                                                                |                                                                                                                                               | 100%                | 0%                  |    |
|     | B       | A2      | (3)-01359           | hypothetical protein                                                                                                                                                                                                          |                                                                                                                                               | 93%                 | 0%                  |    |
|     | B       | A2      | (3)-01362           | hypothetical protein                                                                                                                                                                                                          |                                                                                                                                               | 100%                | 0%                  |    |
|     | B       | A2      | (3)-01533           | hypothetical protein                                                                                                                                                                                                          |                                                                                                                                               | 93%                 | 3%                  |    |
| C42 | B       | A2      | (3)-01642 (3)-01641 | PF00005.22 ABC_tran ABC transporter]                                                                                                                                                                                          |                                                                                                                                               | 100%                | 0%                  |    |
|     | B       | A2      | (3)-01660           | PF12730.2 ABC2_membrane_4 ABC-2 family transporter protein]                                                                                                                                                                   |                                                                                                                                               | 100%                | 0%                  |    |
|     | B       | A2      | (3)-01661           | PF13304.1 AAA_21 AAA domain]                                                                                                                                                                                                  |                                                                                                                                               | 100%                | 3%                  |    |
|     | B       | A2      | (3)-01684           | hypothetical protein                                                                                                                                                                                                          |                                                                                                                                               | 93%                 | 0%                  |    |
|     | B       | A2      | (3)-01695           | hypothetical protein                                                                                                                                                                                                          |                                                                                                                                               | 87%                 | 14%                 |    |
| C43 | B       | A2      | (3)-01784           | PF00480.15 ROK ROK family]                                                                                                                                                                                                    |                                                                                                                                               | 100%                | 14%                 |    |
|     | B       | A2      | (3)-01785           | PF13377.1 Peripla_BP_3 Periplasmic binding protein-like domain].PF00356.16 LacI Bacterial regulatory proteins, lacI family].PF01381.17 HTH_3 Helix-turn-helix]                                                                |                                                                                                                                               | 100%                | 14%                 |    |
|     | B       | A2      | (3)-01786           | TIGR01322 scrB_fam: sucrose-6-phosphate hydrolase].PF08244.7 Glyco_hydro_32C Glycosyl hydrolases family 32 C terminal]                                                                                                        |                                                                                                                                               | 100%                | 14%                 |    |
|     | B       | A2      | (3)-01787           | TIGR01996 PTS-II-BC-sucr: PTS system, sucrose-specific IIBC component].PF00358.15 PTS_EIIA_1 phosphoenolpyruvate-dependent sugar phosphotransferase system, EIIA 1]                                                           |                                                                                                                                               | 100%                | 16%                 |    |
|     | B       | A2      | (3)-01789 (3)-01788 | PF00128.19 Alpha-amylase Alpha amylase, catalytic domain]                                                                                                                                                                     |                                                                                                                                               | 100%                | 16%                 |    |

|     |   |    |                     |                                                                                                                                                                                    |      |     |
|-----|---|----|---------------------|------------------------------------------------------------------------------------------------------------------------------------------------------------------------------------|------|-----|
| C44 | B | A2 | (3)-01805           | PF00874.15 PRD PRD domain PF05043.8 Mga[Mga helix-turn-helix domain] PF00359.17 PTS_EIIA_2[Phosphoenolpyruvate-dependent sugar phosphotransferase system, EIIA 2]                  | 93%  | 16% |
|     | B | A2 | (3)-01806           | PF00359.17 PTS_EIIA_2[Phosphoenolpyruvate-dependent sugar phosphotransferase system, EIIA 2]                                                                                       | 93%  | 16% |
|     | B | A2 | (3)-01807           | PF02302.12 PTS_IIB PTS system, Lactose/Cellobiose specific IIB subunit                                                                                                             | 93%  | 16% |
|     | B | A2 | (3)-01808           | PF03611.9 EIIc-GAT PTS system sugar-specific permease component                                                                                                                    | 93%  | 16% |
| C45 | B | A2 | (3)-01809           | PF13580.1 SIS_2 SIS domain                                                                                                                                                         | 93%  | 0%  |
|     | B | A2 | (3)-01860           | PF02302.12 PTS_IIB PTS system, Lactose/Cellobiose specific IIB subunit                                                                                                             | 93%  | 0%  |
|     | B | A2 | (3)-01861           | PF01380.17 SIS SIS domain PF01418.12 HTH_6 Helix-turn-helix domain, rpiR family                                                                                                    | 93%  | 0%  |
|     | B | A2 | (3)-01862           | TIGR02004 PTS-IIBC-malX: PTS system, maltose and glucose-specific IIBC component TIGR00826 EIIb_glc: PTS system, glucose-like IIB component                                        | 93%  | 0%  |
| C46 | B | A2 | (3)-01863           | PF00155.16 Aminotran_1_2 Aminotransferase class I and II                                                                                                                           | 100% | 0%  |
|     | B | A2 | (3)-01865           | PF13671.1 AAA_33 AAA domain PF06414.7 Zeta_toxin Zeta toxin                                                                                                                        | 100% | 0%  |
|     | B | A2 | (3)-01866           | PF00383.17 dCMP_cyt_deam_1 Cytidine and deoxycytidylate deaminase zinc-binding region                                                                                              | 100% | 5%  |
|     | B | A2 | (3)-01908           | hypothetical protein                                                                                                                                                               | 93%  | 5%  |
| C47 | B | A2 | (3)-01909           | PF09992.4 DUF2233 Predicted periplasmic protein (DUF2233)                                                                                                                          | 93%  | 5%  |
|     | B | A2 | (3)-01910           | PF00535.21 Glycosyl_transf_2 Glycosyl transferase family 2 PF04138.9 GtrA GtrA-like protein                                                                                        | 93%  | 5%  |
|     | B | A2 | (3)-01944           | PF13527.1 Acetyltransf_9 Acetyltransferase (GNAT) domain PF00583.19 Acetyltransf_1 Acetyltransferase (GNAT) family                                                                 | 100% | 5%  |
|     | B | A2 | (3)-01947           | hypothetical protein                                                                                                                                                               | 100% | 5%  |
| C48 | B | A2 | (3)-02009           | hypothetical protein                                                                                                                                                               | 93%  | 5%  |
|     | B | A2 | (3)-02010           | PF11187.3 DUF2974 Protein of unknown function (DUF2974)                                                                                                                            | 100% | 5%  |
|     | B | A2 | (3)-02012           | hypothetical protein                                                                                                                                                               | 100% | 5%  |
|     | B | A2 | (3)-02023           | hypothetical protein                                                                                                                                                               | 100% | 5%  |
| C49 | B | A2 | (3)-02056           | PF00496.17 SBP_bac_5 Bacterial extracellular solute-binding proteins, family 5 Middle                                                                                              | 100% | 11% |
|     | B | A2 | (3)-02057           | PF00528.17 BPD_transp_1 Binding-protein-dependent transport system inner membrane component                                                                                        | 100% | 11% |
|     | B | A2 | (3)-02058           | PF00528.17 BPD_transp_1 Binding-protein-dependent transport system inner membrane component PF12911.2 OppC_N [N-terminal TM domain of oligopeptide transport permease C]           | 100% | 11% |
|     | B | A2 | (3)-02059           | PF00005.22 ABC_tran ABC transporter TIGR01727 oligo_HP_Y: oligopeptide/dipeptide ABC transporter, ATP-binding protein, C-terminal domain                                           | 100% | 11% |
| C50 | B | A2 | (3)-02060           | PF00005.22 ABC_tran ABC transporter PF08352.7 oligo_HP_Y Oligopeptide/dipeptide transporter, C-terminal region                                                                     | 100% | 11% |
|     | B | A2 | (3)-02061           | PF01230.18 HIT HIT domain PF11969.3 DcpS_C Scavenger mRNA decapping enzyme C-term binding                                                                                          | 100% | 11% |
|     | B | A2 | (3)-02065           | PF00093.23 NUD NUDIX domain                                                                                                                                                        | 93%  | 3%  |
|     | B | A2 | (3)-02066           | hypothetical protein                                                                                                                                                               | 93%  | 3%  |
| C51 | B | A2 | (3)-02085           | PF00226.26 DnaJ DnaJ domain                                                                                                                                                        | 100% | 5%  |
|     | B | A2 | (3)-02086           | PF00753.22 Lactamase_B Metallo-beta-lactamase superfamily PF12706.2 Lactamase_B_2 Beta-lactamase superfamily domain                                                                | 100% | 5%  |
|     | B | A2 | (3)-02260           | hypothetical protein                                                                                                                                                               | 100% | 0%  |
|     | B | A2 | (3)-02302           | hypothetical protein                                                                                                                                                               | 87%  | 0%  |
| C52 | B | A2 | (3)-02464           | PF05043.8 Mga[Mga helix-turn-helix domain]                                                                                                                                         | 100% | 0%  |
|     | B | A2 | (3)-02465           | PF05043.8 Mga[Mga helix-turn-helix domain]                                                                                                                                         | 100% | 0%  |
|     | B | A2 | (3)-02474           | hypothetical protein                                                                                                                                                               | 100% | 0%  |
|     | B | A2 | (3)-02475           | hypothetical protein                                                                                                                                                               | 87%  | 0%  |
| C53 | B | A2 | (3)-02477           | hypothetical protein                                                                                                                                                               | 100% | 0%  |
|     | B | A2 | (3)-02478           | hypothetical protein                                                                                                                                                               | 93%  | 0%  |
|     | B | A2 | (3)-02509           | hypothetical protein                                                                                                                                                               | 93%  | 0%  |
|     | B | A2 | (3)-02510           | PF06013.7 WXG100 Proteins of 100 residues with WXG TIGR03930 WXG100_ESAT6: WXG100 family type VII secretion target PF10824.3 DUF2580 Protein of unknown function (DUF2580)         | 87%  | 0%  |
| C54 | B | A2 | (3)-02511           | TIGR03929 T7_esaA_Nterm: type VII secretion protein EsaA                                                                                                                           | 87%  | 0%  |
|     | B | A2 | (3)-02512           | hypothetical protein                                                                                                                                                               | 87%  | 0%  |
|     | B | A2 | (3)-02513           | PF08817.5 YukD WXG100 protein secretion system (Wss), protein YukD                                                                                                                 | 87%  | 0%  |
|     | B | A2 | (3)-02515 (3)-02514 | TIGR03926 T7_EssB: type VII secretion protein EssB PF10140.4 YukC WXG100 protein secretion system (Wss), protein YukC                                                              | 87%  | 0%  |
| C55 | B | A2 | (3)-02516 (3)-02517 | PF01580.13 FtsK_SpoIIIE FtsK/SpoIIIE family PF12846.2 AAA_10 AAA-like domain TIGR03928 T7_EssCb_Firm: type VII secretion protein EssC                                              | 87%  | 0%  |
|     | B | A2 | (3)-02525           | PF01832.15 Glucosaminidase Mannosyl-glycoprotein endo-beta-N-acetylglucosaminidase PF07538.6 ChW Clostridial hydrophobic W                                                         | 100% | 0%  |
|     | B | A2 | (3)-02550           | PF04892.7 VanZ VanZ like family                                                                                                                                                    | 87%  | 5%  |
|     | B | A2 | (3)-02576           | PF00004.24 AAA ATPase family associated with various cellular activities (AAA) PF00158.21 Sigma54_activat Sigma-54 interaction domain PF07724.9 AAA_2 AAA domain (Cdc48 subfamily) | 93%  | 19% |
| C56 | B | A2 | (3)-02636           | PF03009.12 GDP Glycerophosphoryl diester phosphodiesterase family                                                                                                                  | 93%  | 5%  |
|     | B | A2 | (3)-02848           | PF02525.12 Flavodoxin_2 Flavodoxin-like fold PF03368.10 FMN_red NADPH-dependent FMN reductase                                                                                      | 93%  | 3%  |
|     | B | A2 | (3)-02850           | hypothetical protein                                                                                                                                                               | 93%  | 3%  |
|     | B | A2 | (3)-02868           | PF01548.12 DEDD_Tnp_IS110 Transposase PF02371.11 Transposase_20 Transposase IS116/IS110/IS902 family                                                                               | 93%  | 14% |
| C57 | B | A2 | (3)-02841           | hypothetical protein                                                                                                                                                               | 100% | 0%  |
|     | B | A2 | (3)-02866           | TIGR00410 IacE: PTS system, lactose/cellobiose family IIC component PF02378.13 PTS_EIIC Phosphotransferase system, EIIC                                                            | 100% | 0%  |
|     | B | A2 | (3)-02871           | PF05043.8 Mga[Mga helix-turn-helix domain] PF08280.6 HTH_Mga Mga protein trans-acting positive regulator (MGA) HTH domain                                                          | 100% | 0%  |
|     | B | A2 | (3)-02872           | hypothetical protein                                                                                                                                                               | 100% | 0%  |
| C58 | B | A2 | (3)-02873           | hypothetical protein                                                                                                                                                               | 100% | 0%  |
|     | B | A2 | (3)-02874           | hypothetical protein                                                                                                                                                               | 100% | 0%  |
|     | B | A2 | (3)-02875           | hypothetical protein                                                                                                                                                               | 100% | 0%  |
|     | B | A2 | (3)-02876           | PF11797.3 DUF3324 Protein of unknown function C-terminal (DUF3324) PF06030.7 DUF916 Bacterial protein of unknown function (DUF916)                                                 | 100% | 0%  |
| C59 | B | A2 | (3)-02878           | hypothetical protein                                                                                                                                                               | 87%  | 5%  |
|     | B | A2 | (3)-02890           | hypothetical protein                                                                                                                                                               | 100% | 0%  |
|     | B | A2 | (4)-02162           | PF00085.15 Thioredoxin Thioredoxin                                                                                                                                                 | 87%  | 0%  |

(1)- stands for EFAU004\_in the AUS0004 reference genome, (2)- for EfmE4452\_in the E4452 genome, (3)- for EfmE980\_in the E980 genome, (4)- for EFGV\_in the Com12 genome and (5)- for EfmE1162 in the E1162 genome

\* Italicized annotations are from the reference genome
