# Supplementary material for: Emergence of Epidemic Multidrug-Resistant Enterococcus faecium from Animal and Commensal Strains
Source: PubMed Central journal article supplement — mBio. 2013 Aug 20;4(4):e00534-13. doi: 10.1128/mBio.00534-13 (PMC3747589; doi:10.1128/mbio.00534-13), 2013-08-20
Supplement: mbo004131600st3.pdf [file mbo004131600st3.pdf]

Table S3. Occurrence of Antibiotic Resistance Genes

| Name of the isolate        | ST  | Date of isolation | Aminoglycoside         |                  |             |                  |               |                   |            | Macrolide, Lincosamide, Streptogramin |             |             |             |             |             |             |             |             |            | Chloramphenicol  |                  |              |   |
|----------------------------|-----|-------------------|------------------------|------------------|-------------|------------------|---------------|-------------------|------------|---------------------------------------|-------------|-------------|-------------|-------------|-------------|-------------|-------------|-------------|------------|------------------|------------------|--------------|---|
|                            |     |                   | <i>aac(6)-aph(2'')</i> | <i>aac(6)-ii</i> | <i>aadD</i> | <i>ant(6)-Ia</i> | <i>aad9Ib</i> | <i>aph(3)-III</i> | <i>spc</i> | <i>ermA</i>                           | <i>ermB</i> | <i>ermG</i> | <i>ermT</i> | <i>mefA</i> | <i>lnuB</i> | <i>msrC</i> | <i>vatD</i> | <i>vatE</i> | <i>str</i> | <i>cat pC194</i> | <i>cat pC233</i> | <i>cat 7</i> |   |
| EnGen0003                  | 163 | 2001              | 0                      | 1                | 0           | 0                | 0             | 0                 | 0          | 0                                     | 1           | 0           | 0           | 0           | 0           | 2           | 0           | 0           | 0          | 0                | 0                | 0            | 1 |
| Com12                      | 107 | 2006              | 0                      | 1                | 0           | 0                | 0             | 0                 | 0          | 0                                     | 0           | 0           | 0           | 0           | 2           | 0           | 0           | 0           | 0          | 0                | 0                | 0            | 0 |
| EnGen0056                  | 327 | 2000              | 0                      | 1                | 0           | 0                | 0             | 0                 | 0          | 0                                     | 0           | 0           | 0           | 0           | 2           | 0           | 0           | 0           | 0          | 0                | 0                | 0            | 0 |
| EnGen0047                  | 328 | 2004              | 0                      | 1                | 0           | 0                | 0             | 0                 | 0          | 0                                     | 0           | 0           | 0           | 0           | 2           | 0           | 0           | 0           | 0          | 0                | 0                | 0            | 0 |
| 1_141_733                  | 327 | 2005              | 0                      | 1                | 0           | 0                | 0             | 0                 | 0          | 0                                     | 0           | 0           | 0           | 0           | 2           | 0           | 0           | 0           | 0          | 0                | 0                | 0            | 0 |
| EnGen0038                  | 331 | 2006              | 0                      | 1                | 0           | 0                | 0             | 0                 | 0          | 0                                     | 0           | 0           | 0           | 0           | 2           | 0           | 0           | 0           | 0          | 0                | 0                | 0            | 0 |
| Com15                      | 583 | 2006              | 0                      | 1                | 0           | 0                | 0             | 0                 | 0          | 0                                     | 0           | 0           | 0           | 0           | 0           | 0           | 0           | 0           | 0          | 0                | 0                | 0            | 0 |
| EnGen0042                  | 289 | 2001              | 0                      | 1                | 0           | 0                | 0             | 0                 | 0          | 0                                     | 0           | 0           | 0           | 0           | 0           | 0           | 0           | 0           | 0          | 0                | 0                | 0            | 0 |
| E980                       | 94  | 1998              | 0                      | 1                | 0           | 0                | 0             | 0                 | 0          | 0                                     | 0           | 0           | 0           | 0           | 0           | 0           | 0           | 0           | 0          | 0                | 0                | 0            | 0 |
| EnGen0033                  | 299 | 2000              | 0                      | 1                | 0           | 0                | 0             | 0                 | 0          | 0                                     | 0           | 0           | 0           | 0           | 0           | 0           | 0           | 0           | 0          | 0                | 0                | 0            | 0 |
| EnGen0015                  | 61  | 1998              | 0                      | 1                | 0           | 0                | 0             | 0                 | 0          | 0                                     | 0           | 0           | 0           | 0           | 0           | 0           | 0           | 0           | 0          | 0                | 0                | 0            | 0 |
| EnGen0028                  | 75  | 1956              | 0                      | 1                | 0           | 0                | 0             | 0                 | 0          | 0                                     | 0           | 0           | 0           | 0           | 0           | 0           | 0           | 0           | 0          | 0                | 0                | 0            | 0 |
| LCT-EF90                   | nd  | nd                | 0                      | 1                | 0           | 0                | 0             | 0                 | 0          | 0                                     | 0           | 0           | 0           | 0           | 0           | 0           | 0           | 0           | 0          | 0                | 0                | 0            | 0 |
| EnGen0029                  | 77  | 1964              | 0                      | 1                | 0           | 0                | 0             | 0                 | 0          | 0                                     | 0           | 0           | 0           | 0           | 0           | 0           | 0           | 0           | 0          | 0                | 0                | 0            | 0 |
| EnGen0026                  | 296 | 2000              | 0                      | 1                | 0           | 0                | 0             | 0                 | 0          | 0                                     | 0           | 0           | 0           | 0           | 0           | 0           | 0           | 0           | 0          | 0                | 0                | 0            | 0 |
| 1_231_408                  | 582 | 2005              | 1                      | 2                | 0           | 1                | 0             | 1                 | 0          | 0                                     | 1           | 0           | 0           | 0           | 2           | 0           | 0           | 0           | 0          | 0                | 0                | 0            | 0 |
| EnGen0002                  | 117 | 2001              | 0                      | 1                | 0           | 1                | 0             | 1                 | 0          | 0                                     | 1           | 0           | 0           | 0           | 2           | 0           | 0           | 0           | 0          | 0                | 0                | 0            | 0 |
| EnGen0013                  | 80  | 1997              | 0                      | 1                | 0           | 1                | 0             | 1                 | 0          | 0                                     | 1           | 0           | 0           | 0           | 2           | 0           | 0           | 0           | 0          | 0                | 0                | 0            | 0 |
| 1_230_933                  | 18  | 2005              | 1                      | 1                | 0           | 1                | 0             | 1                 | 0          | 0                                     | 1           | 0           | 0           | 0           | 2           | 0           | 0           | 0           | 0          | 0                | 0                | 0            | 0 |
| EnGen0034                  | 117 | 2001              | 1                      | 1                | 0           | 1                | 0             | 1                 | 0          | 0                                     | 1           | 0           | 0           | 0           | 2           | 0           | 0           | 0           | 0          | 0                | 0                | 0            | 0 |
| EnGen0046                  | 78  | 2006              | 3                      | 1                | 0           | 1                | 0             | 1                 | 0          | 0                                     | 2           | 0           | 0           | 2           | 1           | 0           | 0           | 0           | 0          | 0                | 0                | 0            | 0 |
| U0317                      | 78  | 2005              | 3                      | 1                | 0           | 1                | 0             | 1                 | 0          | 0                                     | 1           | 0           | 0           | 2           | 1           | 0           | 0           | 0           | 0          | 0                | 0                | 0            | 0 |
| E4452                      | 266 | 2008              | 0                      | 1                | 0           | 1                | 0             | 1                 | 0          | 0                                     | 1           | 0           | 0           | 0           | 2           | 0           | 0           | 0           | 0          | 0                | 0                | 0            | 0 |
| EnGen0054                  | 78  | 1999              | 0                      | 1                | 0           | 1                | 0             | 1                 | 0          | 0                                     | 1           | 0           | 0           | 0           | 2           | 0           | 0           | 0           | 0          | 0                | 0                | 1            | 0 |
| 1_231_502                  | 203 | 2005              | 2                      | 1                | 0           | 1                | 0             | 1                 | 0          | 0                                     | 1           | 0           | 0           | 0           | 1           | 0           | 0           | 0           | 0          | 0                | 0                | 0            | 0 |
| EnGen0049                  | 78  | 2010              | 1                      | 1                | 0           | 1                | 0             | 1                 | 0          | 0                                     | 1           | 0           | 0           | 2           | 1           | 0           | 0           | 0           | 0          | 0                | 0                | 0            | 0 |
| EnGen0045                  | 78  | 2010              | 1                      | 1                | 0           | 1                | 0             | 1                 | 0          | 0                                     | 1           | 0           | 0           | 2           | 1           | 0           | 0           | 0           | 0          | 0                | 0                | 0            | 0 |
| EnGen0016                  | 64  | 2000              | 1                      | 1                | 0           | 1                | 0             | 1                 | 0          | 0                                     | 1           | 0           | 0           | 0           | 2           | 0           | 0           | 0           | 0          | 0                | 0                | 0            | 0 |
| EnGen0036                  | 18  | 2002              | 1                      | 1                | 0           | 3                | 0             | 1                 | 0          | 0                                     | 1           | 0           | 0           | 0           | 2           | 0           | 0           | 0           | 0          | 0                | 1                | 0            | 0 |
| EnGen0030                  | 325 | 2002              | 0                      | 1                | 0           | 0                | 0             | 0                 | 0          | 0                                     | 0           | 0           | 1           | 0           | 2           | 0           | 0           | 0           | 0          | 0                | 0                | 0            | 0 |
| E4453                      | 192 | 2008              | 0                      | 1                | 0           | 0                | 0             | 0                 | 0          | 0                                     | 1           | 0           | 0           | 0           | 2           | 0           | 0           | 0           | 0          | 0                | 0                | 0            | 0 |
| EnGen0051                  | 78  | 2002              | 1                      | 1                | 0           | 1                | 0             | 1                 | 0          | 0                                     | 1           | 0           | 0           | 0           | 2           | 0           | 0           | 0           | 0          | 0                | 0                | 0            | 0 |
| EnGen0050                  | 78  | 2005              | 1                      | 1                | 0           | 1                | 0             | 1                 | 0          | 0                                     | 1           | 0           | 0           | 0           | 2           | 0           | 0           | 0           | 0          | 0                | 0                | 0            | 0 |
| 1_231_410                  | 17  | 2005              | 0                      | 1                | 0           | 1                | 0             | 1                 | 0          | 0                                     | 1           | 0           | 0           | 0           | 2           | 0           | 0           | 0           | 0          | 0                | 0                | 0            | 0 |
| AUS004                     | 17  | 1998              | 0                      | 1                | 0           | 0                | 0             | 0                 | 0          | 0                                     | 0           | 1           | 0           | 1           | 0           | 2           | 0           | 0           | 0          | 0                | 0                | 0            | 0 |
| C68                        | 16  | 1996              | 1                      | 1                | 0           | 1                | 0             | 1                 | 0          | 0                                     | 1           | 0           | 0           | 0           | 2           | 0           | 0           | 0           | 0          | 0                | 0                | 0            | 0 |
| E1162                      | 17  | 1997              | 0                      | 1                | 0           | 0                | 0             | 0                 | 0          | 0                                     | 0           | 0           | 0           | 0           | 2           | 0           | 0           | 0           | 0          | 0                | 0                | 0            | 0 |
| EnGen0057                  | 78  | 2008              | 0                      | 1                | 0           | 0                | 0             | 0                 | 0          | 0                                     | 0           | 0           | 0           | 0           | 2           | 0           | 0           | 0           | 0          | 0                | 0                | 0            | 0 |
| EnGen0018                  | 159 | 2001              | 0                      | 1                | 0           | 0                | 0             | 0                 | 0          | 0                                     | 0           | 0           | 0           | 0           | 2           | 0           | 0           | 0           | 0          | 0                | 0                | 0            | 0 |
| EnGen0031                  | 22  | 1960              | 0                      | 1                | 0           | 0                | 0             | 0                 | 0          | 0                                     | 0           | 0           | 0           | 0           | 2           | 0           | 0           | 0           | 0          | 0                | 0                | 0            | 0 |
| EnGen0007                  | 160 | 2001              | 0                      | 1                | 0           | 0                | 0             | 0                 | 0          | 0                                     | 0           | 0           | 0           | 0           | 2           | 0           | 0           | 0           | 0          | 0                | 0                | 0            | 0 |
| EnGen0017                  | 92  | 1998              | 0                      | 1                | 0           | 0                | 0             | 0                 | 0          | 0                                     | 0           | 0           | 0           | 0           | 2           | 0           | 0           | 0           | 0          | 0                | 0                | 0            | 0 |
| EnGen0025                  | 92  | 1965              | 0                      | 1                | 0           | 1                | 0             | 1                 | 0          | 0                                     | 1           | 0           | 0           | 0           | 2           | 0           | 0           | 0           | 0          | 0                | 0                | 0            | 0 |
| EnGen0009                  | 21  | 1994              | 0                      | 2                | 0           | 0                | 0             | 0                 | 0          | 0                                     | 0           | 0           | 0           | 0           | 2           | 0           | 0           | 0           | 0          | 0                | 0                | 0            | 0 |
| E1071                      | 32  | 2000              | 0                      | 1                | 0           | 1                | 0             | 0                 | 0          | 0                                     | 1           | 0           | 0           | 2           | 2           | 1           | 0           | 1           | 0          | 0                | 0                | 0            | 0 |
| EnGen0032                  | 104 | 1959              | 0                      | 1                | 0           | 0                | 0             | 0                 | 0          | 0                                     | 0           | 0           | 0           | 0           | 0           | 0           | 0           | 0           | 0          | 0                | 0                | 0            | 0 |
| D344SRF                    | 25  | nd                | 0                      | 2                | 0           | 1                | 0             | 1                 | 0          | 0                                     | 1           | 0           | 0           | 0           | 2           | 0           | 0           | 0           | 0          | 0                | 0                | 0            | 0 |
| TC6                        | 25  | nd                | 0                      | 1                | 0           | 0                | 0             | 0                 | 0          | 1                                     | 2           | 0           | 2           | 0           | 0           | 0           | 0           | 0           | 0          | 0                | 0                | 0            | 0 |
| EnGen0011                  | 26  | 1998              | 0                      | 1                | 0           | 0                | 0             | 0                 | 0          | 0                                     | 1           | 0           | 0           | 0           | 2           | 0           | 0           | 0           | 0          | 0                | 0                | 0            | 1 |
| E1636                      | 106 | 1961              | 0                      | 2                | 0           | 0                | 0             | 0                 | 0          | 0                                     | 0           | 0           | 0           | 0           | 2           | 0           | 0           | 0           | 0          | 0                | 0                | 0            | 0 |
| EnGen0010                  | 26  | 1996              | 0                      | 1                | 0           | 0                | 0             | 0                 | 0          | 0                                     | 0           | 0           | 0           | 0           | 2           | 0           | 0           | 0           | 1          | 0                | 0                | 0            | 0 |
| EnGen0048                  | 310 | 2004              | 0                      | 1                | 0           | 0                | 0             | 0                 | 0          | 0                                     | 0           | 0           | 0           | 0           | 2           | 0           | 0           | 0           | 1          | 0                | 0                | 0            | 0 |
| EnGen0005                  | 9   | 1992              | 0                      | 1                | 0           | 0                | 0             | 0                 | 0          | 0                                     | 0           | 0           | 0           | 0           | 0           | 0           | 0           | 0           | 0          | 1                | 0                | 0            | 0 |
| EnGen0022                  | 9   | 1996              | 0                      | 1                | 0           | 0                | 0             | 0                 | 0          | 0                                     | 1           | 0           | 0           | 0           | 2           | 0           | 0           | 0           | 0          | 1                | 0                | 0            | 0 |
| EnGen0043                  | 12  | 2004              | 0                      | 1                | 0           | 1                | 0             | 0                 | 0          | 0                                     | 1           | 0           | 0           | 0           | 2           | 0           | 0           | 0           | 0          | 0                | 0                | 0            | 0 |
| EnGen0027                  | 67  | 1957              | 0                      | 1                | 0           | 0                | 0             | 0                 | 0          | 0                                     | 0           | 0           | 0           | 0           | 2           | 0           | 0           | 0           | 0          | 0                | 0                | 0            | 0 |
| EnGen0001                  | 158 | 1995              | 0                      | 1                | 0           | 0                | 0             | 0                 | 0          | 0                                     | 1           | 0           | 0           | 0           | 2           | 0           | 0           | 0           | 0          | 0                | 0                | 0            | 0 |
| E1679                      | 114 | 1998              | 1                      | 1                | 0           | 0                | 1             | 0                 | 0          | 1                                     | 1           | 0           | 0           | 0           | 2           | 0           | 0           | 0           | 0          | 0                | 0                | 0            | 0 |
| EnGen0024                  | 210 | 2001              | 1                      | 1                | 0           | 0                | 0             | 1                 | 1          | 1                                     | 2           | 0           | 0           | 0           | 2           | 0           | 0           | 0           | 0          | 0                | 0                | 0            | 0 |
| EnGen0020                  | 27  | 1995              | 0                      | 1                | 0           | 2                | 0             | 1                 | 0          | 0                                     | 1           | 0           | 0           | 2           | 1           | 1           | 0           | 0           | 0          | 0                | 0                | 0            | 0 |
| EnGen0012                  | 27  | 1995              | 0                      | 1                | 0           | 2                | 0             | 1                 | 0          | 0                                     | 2           | 0           | 0           | 2           | 1           | 1           | 0           | 0           | 0          | 0                | 0                | 0            | 0 |
| EnGen0044                  | 27  | 2001              | 0                      | 1                | 0           | 0                | 0             | 0                 | 0          | 0                                     | 0           | 0           | 0           | 0           | 1           | 0           | 0           | 0           | 0          | 0                | 0                | 0            | 0 |
| 1_231_501                  | 52  | 2005              | 0                      | 1                | 0           | 0                | 0             | 0                 | 0          | 0                                     | 0           | 0           | 0           | 0           | 2           | 0           | 0           | 0           | 0          | 0                | 0                | 0            | 0 |
| EnGen0004                  | 127 | 1998              | 0                      | 1                | 0           | 0                | 0             | 0                 | 0          | 0                                     | 0           | 0           | 0           | 0           | 2           | 0           | 0           | 0           | 0          | 0                | 0                | 0            | 0 |
| EnGen0052                  | 332 | 2002              | 0                      | 1                | 0           | 0                | 0             | 0                 | 0          | 0                                     | 0           | 0           | 0           | 0           | 1           | 0           | 0           | 0           | 0          | 0                | 0                | 0            | 0 |
| EnGen0039                  | 69  | 1981              | 0                      | 1                | 0           | 0                | 0             | 0                 | 0          | 0                                     | 0           | 0           | 0           | 0           | 1           | 0           | 0           | 0           | 0          | 0                | 0                | 0            | 0 |
| EnGen0019                  | 151 | 1995              | 0                      | 1                | 0           | 0                | 0             | 0                 | 0          | 0                                     | 1           | 0           | 0           | 0           | 2           | 1           | 0           | 0           | 1          | 0                | 0                | 0            | 0 |
| EnGen0040                  | 66  | 1982              | 0                      | 1                | 0           | 0                | 0             | 0                 | 0          | 0                                     | 0           | 0           | 0           | 0           | 2           | 0           | 0           | 0           | 0          | 0                | 0                | 0            | 0 |
| EnGen0008                  | 5   | 1995              | 0                      | 1                | 0           | 2                | 0             | 1                 | 0          | 0                                     | 1           | 0           | 1           | 2           | 2           | 0           | 1           | 0           | 0          | 0                | 0                | 0            | 0 |
| EnGen0021                  | 5   | 2002              | 0                      | 1                | 0           | 0                | 0             | 0                 | 0          | 0                                     | 1           | 0           | 0           | 0           | 2           | 0           | 0           | 0           | 0          | 0                | 0                | 0            | 0 |
| E1039                      | 42  | 1998              | 0                      | 1                | 0           | 0                | 0             | 0                 | 0          | 0                                     | 0           | 0           | 0           | 0           | 2           | 0           | 0           | 0           | 0          | 0                | 0                | 0            | 0 |
| EnGen0014                  | 150 | 1995              | 0                      | 1                | 0           | 1                | 0             | 1                 | 0          | 0                                     | 1           | 0           | 0           | 2           | 2           | 0           | 0           | 0           | 0          | 0                | 0                | 0            | 0 |
| EnGen0035                  | 66  | 1979              | 0                      | 1                | 2           | 1                | 0             | 0                 | 0          | 0                                     | 1           | 0           | 0           | 0           | 2           | 0           | 0           | 0           | 0          | 0                | 0                | 0            | 0 |
| Prevalence (%)             |     |                   | 21                     | 100              | 1           | 37               | 3             | 34                | 4          | 3                                     | 51          | 1           | 4           | 3           | 12          | 84          | 5           | 1           | 5          | 3                | 3                | 3            | 3 |
| Prevalence in clade A1 (%) |     |                   | 57                     | 100              | 0           | 76               | 0             | 76                | 0          | 0                                     | 81          | 5           | 5           | 5           | 19          | 100         | 0           | 0           | 0          | 0                | 10               | 0            | 0 |
| Prevalence in clade A2 (%) |     |                   | 6                      | 100              | 1           | 25               | 2             | 20                | 3          | 6                                     | 49</        |             |             |             |             |             |             |             |            |                  |                  |              |   |

| col | Tetracycline |       |      |      |      | Glycopeptide |             | Others      |      |      |      | Name of the isolate        | ST  | Date of isolation |
|-----|--------------|-------|------|------|------|--------------|-------------|-------------|------|------|------|----------------------------|-----|-------------------|
|     | cat 8        | cat 9 | tetC | tetL | tetM | tetU         | vanA operon | vanB operon | fosB | tusA | bacA |                            |     |                   |
| 0   | 0            | 0     | 1    | 2    | 0    | 0            | 0           | 0           | 0    | 1    | 0    | EnGen0003                  | 163 | 2001              |
| 0   | 0            | 0     | 0    | 0    | 0    | 0            | 0           | 0           | 0    | 1    | 0    | Com12                      | 107 | 2006              |
| 0   | 0            | 0     | 0    | 0    | 0    | 0            | 0           | 0           | 0    | 1    | 0    | EnGen0056                  | 327 | 2000              |
| 0   | 0            | 0     | 0    | 0    | 0    | 0            | 0           | 0           | 0    | 1    | 0    | EnGen0047                  | 328 | 2004              |
| 0   | 0            | 0     | 0    | 0    | 0    | 0            | 0           | 0           | 0    | 1    | 0    | 1_141_733                  | 327 | 2005              |
| 0   | 0            | 0     | 0    | 0    | 0    | 0            | 0           | 0           | 0    | 1    | 0    | EnGen0038                  | 331 | 2006              |
| 0   | 0            | 1     | 0    | 0    | 0    | 0            | 0           | 0           | 0    | 1    | 0    | Com15                      | 583 | 2006              |
| 0   | 0            | 0     | 0    | 0    | 0    | 0            | 0           | 0           | 0    | 1    | 0    | EnGen0042                  | 289 | 2001              |
| 0   | 0            | 0     | 0    | 0    | 0    | 0            | 0           | 0           | 0    | 1    | 0    | E980                       | 94  | 1998              |
| 0   | 0            | 0     | 0    | 0    | 0    | 0            | 0           | 0           | 0    | 1    | 0    | EnGen0033                  | 299 | 2000              |
| 0   | 0            | 0     | 0    | 0    | 0    | 0            | 0           | 0           | 0    | 1    | 0    | EnGen0015                  | 61  | 1998              |
| 0   | 0            | 0     | 0    | 0    | 0    | 0            | 0           | 0           | 0    | 1    | 0    | EnGen0028                  | 75  | 1956              |
| 0   | 0            | 0     | 0    | 0    | 0    | 0            | 0           | 0           | 0    | 0    | 0    | LCT-EF90                   | nd  | nd                |
| 0   | 0            | 0     | 0    | 0    | 0    | 0            | 0           | 0           | 0    | 1    | 0    | EnGen0029                  | 77  | 1964              |
| 0   | 0            | 0     | 0    | 0    | 0    | 0            | 0           | 0           | 0    | 1    | 0    | EnGen0026                  | 296 | 2000              |
| 0   | 0            | 0     | 0    | 0    | 0    | 0            | 0           | 0           | 0    | 2    | 1    | 1_231_408                  | 582 | 2005              |
| 0   | 0            | 0     | 1    | 0    | 0    | 0            | 1           | 0           | 1    | 1    | 1    | EnGen0002                  | 117 | 2001              |
| 0   | 0            | 0     | 0    | 0    | 0    | 2            | 0           | 0           | 1    | 1    | 1    | EnGen0013                  | 80  | 1997              |
| 0   | 0            | 0     | 0    | 2    | 1    | 1            | 0           | 0           | 1    | 1    | 0    | 1_230_933                  | 18  | 2005              |
| 0   | 0            | 0     | 0    | 0    | 0    | 1            | 0           | 0           | 1    | 1    | 1    | EnGen0034                  | 117 | 2001              |
| 0   | 0            | 0     | 0    | 0    | 0    | 0            | 0           | 0           | 1    | 1    | 0    | EnGen0046                  | 78  | 2006              |
| 0   | 0            | 0     | 0    | 0    | 0    | 0            | 0           | 0           | 1    | 1    | 0    | U0317                      | 78  | 2005              |
| 0   | 0            | 0     | 1    | 3    | 0    | 0            | 0           | 0           | 1    | 1    | 0    | E4452                      | 266 | 2008              |
| 1   | 0            | 0     | 1    | 0    | 0    | 0            | 0           | 0           | 1    | 1    | 0    | EnGen0054                  | 78  | 1999              |
| 0   | 0            | 0     | 0    | 0    | 0    | 1            | 0           | 0           | 1    | 1    | 0    | 1_231_502                  | 203 | 2005              |
| 0   | 0            | 0     | 1    | 0    | 0    | 2            | 0           | 0           | 1    | 1    | 0    | EnGen0049                  | 78  | 2010              |
| 0   | 0            | 0     | 1    | 0    | 1    | 2            | 0           | 0           | 1    | 1    | 0    | EnGen0045                  | 78  | 2010              |
| 0   | 0            | 0     | 0    | 2    | 0    | 0            | 0           | 0           | 1    | 1    | 1    | EnGen0016                  | 64  | 2000              |
| 1   | 0            | 0     | 1    | 0    | 0    | 0            | 0           | 0           | 1    | 1    | 0    | EnGen0036                  | 18  | 2002              |
| 0   | 0            | 0     | 1    | 3    | 0    | 0            | 0           | 0           | 1    | 1    | 1    | EnGen0030                  | 325 | 2002              |
| 0   | 0            | 0     | 0    | 2    | 0    | 0            | 0           | 0           | 1    | 1    | 0    | E4453                      | 192 | 2008              |
| 0   | 0            | 0     | 0    | 0    | 0    | 1            | 0           | 0           | 1    | 2    | 0    | EnGen0051                  | 78  | 2002              |
| 0   | 0            | 0     | 0    | 0    | 0    | 1            | 0           | 0           | 1    | 2    | 0    | EnGen0050                  | 78  | 2005              |
| 0   | 0            | 0     | 0    | 0    | 0    | 1            | 0           | 0           | 1    | 2    | 1    | 1_231_410                  | 17  | 2005              |
| 0   | 0            | 0     | 0    | 3    | 0    | 0            | 1           | 0           | 1    | 1    | 1    | AUS0004                    | 17  | 1998              |
| 0   | 0            | 0     | 0    | 0    | 0    | 0            | 1           | 0           | 1    | 1    | 1    | C68                        | 16  | 1996              |
| 0   | 0            | 0     | 1    | 0    | 1    | 0            | 0           | 0           | 1    | 1    | 0    | E1162                      | 17  | 1997              |
| 0   | 0            | 0     | 0    | 2    | 0    | 0            | 0           | 0           | 1    | 1    | 0    | EnGen0057                  | 78  | 2008              |
| 0   | 0            | 0     | 0    | 0    | 0    | 0            | 0           | 0           | 1    | 1    | 0    | EnGen0018                  | 159 | 2001              |
| 0   | 0            | 0     | 0    | 0    | 0    | 0            | 0           | 0           | 1    | 1    | 0    | EnGen0031                  | 22  | 1960              |
| 0   | 0            | 0     | 0    | 0    | 0    | 0            | 0           | 0           | 1    | 1    | 0    | EnGen0007                  | 160 | 2001              |
| 0   | 0            | 0     | 0    | 0    | 0    | 0            | 0           | 0           | 1    | 1    | 0    | EnGen0017                  | 92  | 1998              |
| 0   | 0            | 0     | 0    | 2    | 0    | 0            | 0           | 0           | 1    | 1    | 0    | EnGen0025                  | 92  | 1965              |
| 0   | 0            | 0     | 0    | 0    | 0    | 0            | 0           | 0           | 1    | 1    | 0    | EnGen0009                  | 21  | 1994              |
| 1   | 0            | 0     | 1    | 0    | 0    | 1            | 0           | 0           | 1    | 1    | 0    | E1071                      | 32  | 2000              |
| 0   | 0            | 0     | 0    | 0    | 0    | 0            | 0           | 0           | 1    | 1    | 0    | EnGen0032                  | 104 | 1959              |
| 0   | 0            | 0     | 1    | 2    | 0    | 0            | 0           | 0           | 0    | 1    | 0    | D344SRF                    | 25  | nd                |
| 0   | 0            | 0     | 1    | 2    | 0    | 0            | 0           | 0           | 0    | 1    | 0    | TC6                        | 25  | nd                |
| 0   | 0            | 0     | 0    | 2    | 0    | 0            | 0           | 0           | 1    | 2    | 0    | EnGen0011                  | 26  | 1998              |
| 0   | 0            | 0     | 0    | 2    | 1    | 0            | 0           | 0           | 1    | 1    | 0    | E1636                      | 106 | 1961              |
| 0   | 0            | 0     | 0    | 4    | 0    | 1            | 0           | 0           | 1    | 1    | 0    | EnGen0010                  | 26  | 1996              |
| 0   | 0            | 0     | 0    | 0    | 0    | 2            | 0           | 0           | 1    | 1    | 0    | EnGen0048                  | 310 | 2004              |
| 0   | 1            | 0     | 0    | 1    | 0    | 0            | 0           | 0           | 1    | 1    | 0    | EnGen0005                  | 9   | 1992              |
| 0   | 1            | 0     | 0    | 2    | 0    | 1            | 0           | 0           | 1    | 2    | 0    | EnGen0022                  | 9   | 1996              |
| 0   | 0            | 0     | 1    | 1    | 0    | 0            | 0           | 0           | 1    | 1    | 0    | EnGen0043                  | 12  | 2004              |
| 0   | 0            | 0     | 0    | 0    | 0    | 0            | 0           | 0           | 1    | 1    | 0    | EnGen0027                  | 67  | 1957              |
| 0   | 0            | 0     | 0    | 1    | 0    | 2            | 0           | 0           | 1    | 1    | 0    | EnGen0001                  | 158 | 1995              |
| 0   | 0            | 0     | 0    | 0    | 0    | 1            | 0           | 1           | 1    | 2    | 0    | E1679                      | 114 | 1998              |
| 0   | 0            | 0     | 0    | 0    | 0    | 0            | 0           | 0           | 1    | 1    | 1    | EnGen0024                  | 210 | 2001              |
| 0   | 0            | 0     | 1    | 0    | 0    | 1            | 0           | 0           | 1    | 1    | 0    | EnGen0020                  | 27  | 1995              |
| 0   | 0            | 0     | 1    | 0    | 0    | 1            | 0           | 0           | 1    | 1    | 0    | EnGen0012                  | 27  | 1995              |
| 0   | 0            | 0     | 0    | 0    | 0    | 0            | 0           | 0           | 1    | 1    | 0    | EnGen0044                  | 27  | 2001              |
| 0   | 0            | 0     | 0    | 0    | 0    | 0            | 0           | 0           | 1    | 1    | 0    | 1_231_501                  | 52  | 2005              |
| 0   | 0            | 0     | 0    | 0    | 0    | 0            | 0           | 0           | 1    | 1    | 0    | EnGen0004                  | 127 | 1998              |
| 0   | 0            | 0     | 0    | 0    | 0    | 0            | 0           | 0           | 0    | 1    | 0    | EnGen0052                  | 332 | 2002              |
| 0   | 0            | 0     | 0    | 0    | 0    | 0            | 0           | 0           | 0    | 1    | 0    | EnGen0039                  | 69  | 1981              |
| 0   | 0            | 0     | 1    | 0    | 0    | 1            | 0           | 0           | 1    | 1    | 0    | EnGen0019                  | 151 | 1995              |
| 0   | 0            | 0     | 0    | 0    | 0    | 0            | 0           | 0           | 1    | 1    | 0    | EnGen0040                  | 66  | 1982              |
| 1   | 0            | 0     | 1    | 4    | 0    | 0            | 0           | 0           | 1    | 1    | 0    | EnGen0008                  | 5   | 1995              |
| 0   | 0            | 0     | 0    | 2    | 0    | 1            | 0           | 0           | 1    | 1    | 0    | EnGen0021                  | 5   | 2002              |
| 0   | 0            | 0     | 0    | 0    | 0    | 0            | 0           | 0           | 0    | 1    | 0    | E1039                      | 42  | 1998              |
| 0   | 0            | 0     | 1    | 0    | 0    | 0            | 0           | 0           | 1    | 1    | 0    | EnGen0014                  | 150 | 1995              |
| 1   | 0            | 0     | 1    | 0    | 0    | 0            | 0           | 0           | 1    | 1    | 0    | EnGen0035                  | 66  | 1979              |
| 7   | 3            | 1     | 26   | 27   | 5    | 26           | 4           | 1           | 71   | 99   | 14   | Prevalence (%)             |     |                   |
| 10  | 0            | 0     | 33   | 33   | 14   | 43           | 10          | 0           | 100  | 100  | 33   | Prevalence in clade A1 (%) |     |                   |
| 9   | 6            | 0     | 29   | 34   | 3    | 29           | 0           | 3           | 86   | 100  | 3    | Prevalence in clade A2 (%) |     |                   |
| 9   | 4            | 0     | 30   | 34   | 7    | 34           | 4           | 2           | 91   | 100  | 14   | Prevalence in A (%)        |     |                   |
| 0   | 0            | 7     | 7    | 7    | 0    | 0            | 0           | 0           | 0    | 93   | 0    | Prevalence in clade B (%)  |     |                   |
